# Supplementary material for: An Unsupervised Classifier for Whole-Genome Phylogenies, the Maxwell© Tool
Source: MDPI journal article supplement (doi:10.3390/ijms242216278), 2023-11-13
Supplement: s1 [file s1]

**Table S1.** List of the classical classifiers with their main characteristics.

|                                                                                                                                                                                                                                                                                                                                                                                                                                                                                                                                                                                                                                                                                                                                                                                                                                                                                                                                                                                                                                                                                                                                                                                                                                                                                                                                                                                                                                                                                                                                                                                                                                                                                                                                                                                                                                                                                                                                                                                                                                                                                                                                                                                                                                                                                                                                                                                                                                                                                                                                                                                                                                                                                                                                                                                                                                                                                                                                                                                                                                                                                                                                                                                                                                                                                                                                                                                                                                                                                                                                                                                                                                                                                                                                                                                                                                                                                                                                                                                                                                                                                                                                                                                                                                                                                                                                                                                                                                                                                                                                                                                                                                                                         |
|-------------------------------------------------------------------------------------------------------------------------------------------------------------------------------------------------------------------------------------------------------------------------------------------------------------------------------------------------------------------------------------------------------------------------------------------------------------------------------------------------------------------------------------------------------------------------------------------------------------------------------------------------------------------------------------------------------------------------------------------------------------------------------------------------------------------------------------------------------------------------------------------------------------------------------------------------------------------------------------------------------------------------------------------------------------------------------------------------------------------------------------------------------------------------------------------------------------------------------------------------------------------------------------------------------------------------------------------------------------------------------------------------------------------------------------------------------------------------------------------------------------------------------------------------------------------------------------------------------------------------------------------------------------------------------------------------------------------------------------------------------------------------------------------------------------------------------------------------------------------------------------------------------------------------------------------------------------------------------------------------------------------------------------------------------------------------------------------------------------------------------------------------------------------------------------------------------------------------------------------------------------------------------------------------------------------------------------------------------------------------------------------------------------------------------------------------------------------------------------------------------------------------------------------------------------------------------------------------------------------------------------------------------------------------------------------------------------------------------------------------------------------------------------------------------------------------------------------------------------------------------------------------------------------------------------------------------------------------------------------------------------------------------------------------------------------------------------------------------------------------------------------------------------------------------------------------------------------------------------------------------------------------------------------------------------------------------------------------------------------------------------------------------------------------------------------------------------------------------------------------------------------------------------------------------------------------------------------------------------------------------------------------------------------------------------------------------------------------------------------------------------------------------------------------------------------------------------------------------------------------------------------------------------------------------------------------------------------------------------------------------------------------------------------------------------------------------------------------------------------------------------------------------------------------------------------------------------------------------------------------------------------------------------------------------------------------------------------------------------------------------------------------------------------------------------------------------------------------------------------------------------------------------------------------------------------------------------------------------------------------------------------------------------------------|
| <ul style="list-style-type: none"> <li>• <code>CalibratedClassifierCV(LinearDiscriminantAnalysis())</code>: Linear Discriminant Analysis (LDA) is a classifier with a linear decision boundary, generated by fitting class conditional densities to the data and using Bayes' rule. The model fits a Gaussian density to each class. <code>'CalibratedClassifierCV'</code> is a probability calibration with isotonic regression or sigmoid.</li> <li>• <code>'CalibratedClassifierCV(QuadraticDiscriminantAnalysis())'</code>: Similar to LDA but Quadratic Discriminant Analysis (QDA) allows for the decision boundary to be quadratic.</li> <li>• <code>'DecisionTreeClassifier()'</code>: A decision tree classifier builds a model in the form of a tree structure, making decisions based on feature values.</li> <li>• <code>'ExtraTreeClassifier()'</code>: An extremely randomized tree classifier, this algorithm randomizes certain decisions and thresholds more than a regular decision tree, adding additional randomness to the model.</li> <li>• <code>'DummyClassifier()'</code>: This is a classifier that makes predictions using simple rules, and is useful as a simple baseline to compare with other (real) classifiers.</li> <li>• <code>'RandomForestClassifier()'</code>: A forest of randomized decision trees, often yielding highly accurate predictions.</li> <li>• <code>'BaggingClassifier()'</code>: Bagging (Bootstrap Aggregating) is a way to decrease the variance of the prediction by generating additional data for training from dataset using combinations with repetitions to produce multisets of the same size as the original.</li> <li>• <code>'ExtraTreesClassifier()'</code>: Extra Trees is like a Random Forest, in that it builds multiple trees and splits nodes using random subsets of features, but with two key differences: it does not bootstrap observations (meaning it samples without replacement), and nodes are split on random splits, not best splits.</li> <li>• <code>'AdaBoostClassifier()'</code>: The core principle of AdaBoost is to fit a sequence of weak learners (i.e., models that are only slightly better than random guessing) on repeatedly modified versions of the data.</li> <li>• <code>'GradientBoostingClassifier()'</code>: Gradient Boosting builds an additive model in a forward stage-wise fashion; it allows for the optimization of arbitrary differentiable loss functions.</li> <li>• <code>'LogisticRegression()'</code>: Logistic regression, despite its name, is a linear model for classification rather than regression. It is also used in the last layer of Neural Network models.</li> <li>• <code>'SGDClassifier()'</code>: Linear classifiers (SVM, logistic regression, etc.) with SGD training. SGD stands for Stochastic Gradient Descent: the gradient of the loss is estimated each sample at a time and the model is updated along the way with a decreasing strength schedule (aka learning rate).</li> <li>• <code>'RidgeClassifier()'</code>: Classifier using Ridge regression. This classifier first converts the target values into <math>\{-1, 1\}</math> and then treats the problem as a regression task (multi-output regression in the multiclass case).</li> <li>• <code>'RidgeClassifierCV()'</code>: Ridge classifier with built-in cross-validation.</li> <li>• <code>'PassiveAggressiveClassifier()'</code>: Passive Aggressive algorithms are online learning algorithms. Such an algorithm remains passive for a correct classification outcome, and turns aggressive in the event of a miscalculation, updating and adjusting.</li> <li>• <code>'LogisticRegressionCV()'</code>: Logistic regression CV (Cross-Validation) classifier.</li> <li>• <code>'Perceptron()'</code>: The Perceptron is another simple classification algorithm suitable for large scale learning.</li> <li>• <code>'BernoulliNB()'</code>: Naive Bayes classifier for multivariate Bernoulli models.</li> <li>• <code>'GaussianNB()'</code>: Gaussian Naive Bayes (GaussianNB) classifier. Can perform online updates to model parameters via the <code>'partial_fit'</code> method (for details on algorithm used to update feature means and variance online, see Stanford CS tech report STAN-CS-79-773).</li> <li>• <code>'KNeighborsClassifier()'</code>: Classifier implementing the k-nearest neighbors vote.</li> <li>• <code>'NearestCentroid()'</code>: Nearest Centroid is a simple algorithm representing each class by the centroid of its members. It also has no parameters to choose, making it a good baseline classifier.</li> </ul> |
|-------------------------------------------------------------------------------------------------------------------------------------------------------------------------------------------------------------------------------------------------------------------------------------------------------------------------------------------------------------------------------------------------------------------------------------------------------------------------------------------------------------------------------------------------------------------------------------------------------------------------------------------------------------------------------------------------------------------------------------------------------------------------------------------------------------------------------------------------------------------------------------------------------------------------------------------------------------------------------------------------------------------------------------------------------------------------------------------------------------------------------------------------------------------------------------------------------------------------------------------------------------------------------------------------------------------------------------------------------------------------------------------------------------------------------------------------------------------------------------------------------------------------------------------------------------------------------------------------------------------------------------------------------------------------------------------------------------------------------------------------------------------------------------------------------------------------------------------------------------------------------------------------------------------------------------------------------------------------------------------------------------------------------------------------------------------------------------------------------------------------------------------------------------------------------------------------------------------------------------------------------------------------------------------------------------------------------------------------------------------------------------------------------------------------------------------------------------------------------------------------------------------------------------------------------------------------------------------------------------------------------------------------------------------------------------------------------------------------------------------------------------------------------------------------------------------------------------------------------------------------------------------------------------------------------------------------------------------------------------------------------------------------------------------------------------------------------------------------------------------------------------------------------------------------------------------------------------------------------------------------------------------------------------------------------------------------------------------------------------------------------------------------------------------------------------------------------------------------------------------------------------------------------------------------------------------------------------------------------------------------------------------------------------------------------------------------------------------------------------------------------------------------------------------------------------------------------------------------------------------------------------------------------------------------------------------------------------------------------------------------------------------------------------------------------------------------------------------------------------------------------------------------------------------------------------------------------------------------------------------------------------------------------------------------------------------------------------------------------------------------------------------------------------------------------------------------------------------------------------------------------------------------------------------------------------------------------------------------------------------------------------------------------------------------|

- `'MLPClassifier()'`: Multi-layer Perceptron classifier. This model optimizes the log-loss function using LBFGS or stochastic gradient descent.
- `'LabelPropagation()'`: Label Propagation classifier is a semi-supervised learning method that propagates labels from the labeled to the unlabeled data.
- `'SVC(probability=True)'`: C-Support Vector Classification. The implementation is based on libsvm. The fit time complexity is more than quadratic with the number of samples which makes it hard to scale to datasets with more than a couple of 10000 samples.
- `'LinearSVC()'`: Linear Support Vector Classification. Similar to SVC with parameter `kernel='linear'`, but implemented in terms of liblinear rather than libsvm, so it has more flexibility in the choice of penalties and loss functions and should scale better to large numbers of samples.

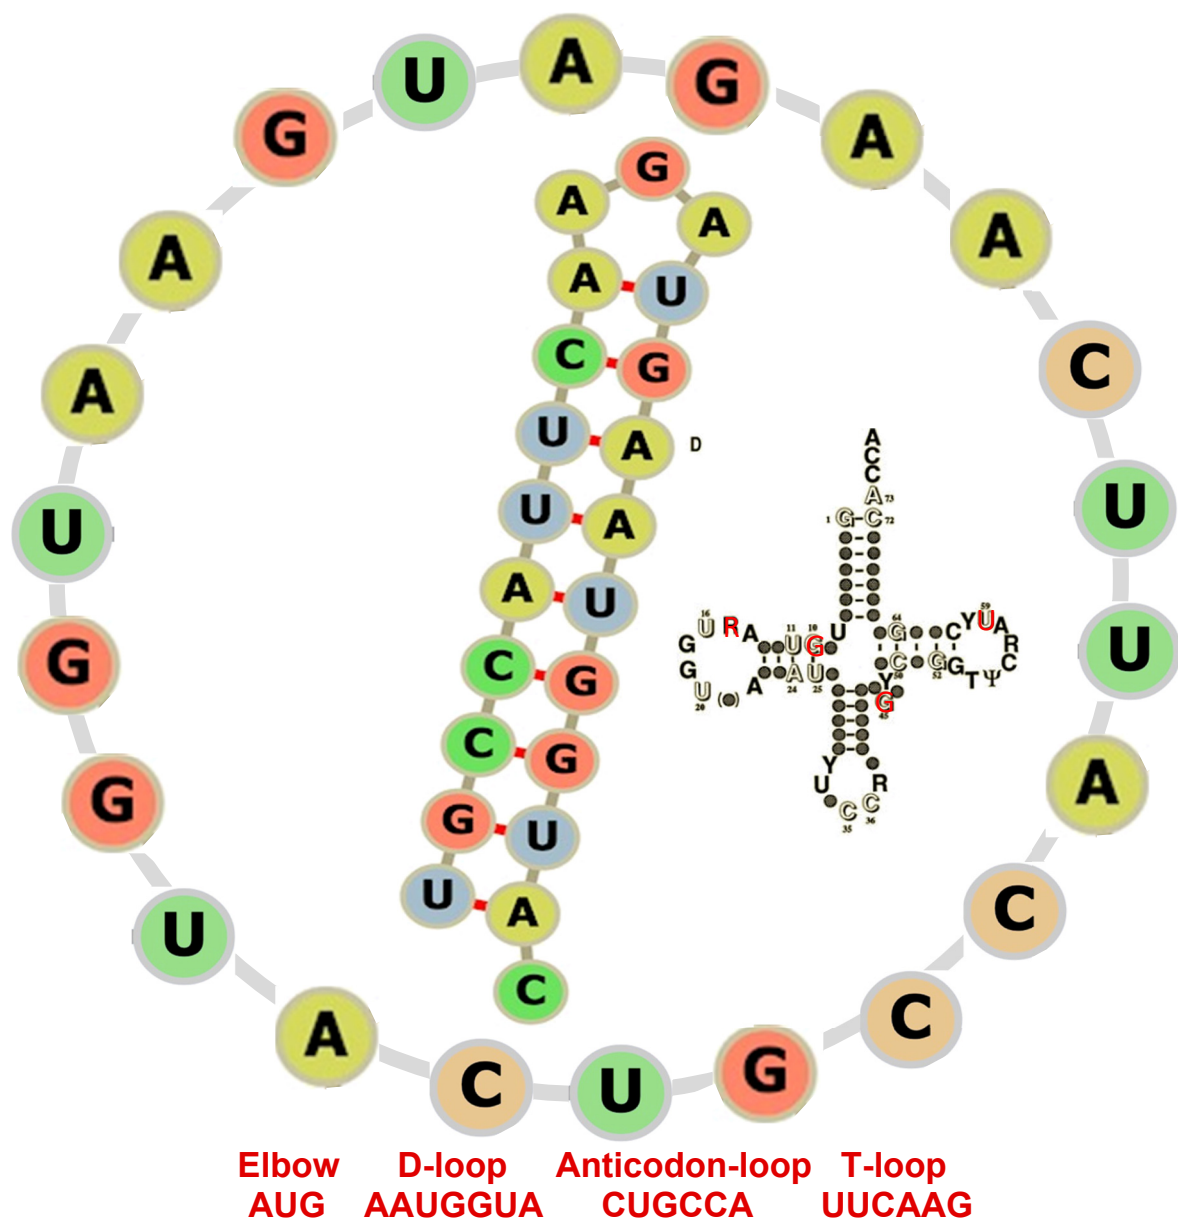

CGGGCUUUGAUGUAGACUGGUAUCAUACGGCCUGCCACGGCCGACACCCGGGUUCAAAUCCCGGAGGCCGCACCA  
Methanococcus maripaludis strain S2, complete sequence GenBank: BX950229.1: c1269120-1269048 tRNA-Gly

**Figure S1.** Top: Representation of the two forms (ring and inside hairpin) of the circular RNA AL (for Archetypal Loop) built from the most frequent nucleotides of the tRNA-Gly loops of

Archaeota. Inside the ring on the left of the hairpin, consensus tRNA-Gly secondary structure of yeast and mammalian tRNA-Gly's, with in red nucleotides different from the corresponding ones in the tRNA-GlyGCC of *Methanococcus maripaludis*; Bottom: tRNA-GlyGCC of *M. maripaludis* with AL-nucleotides in red.

**Table S2.** List of tRNA-Gly<sup>GCC</sup> from 246 species extracted from GtRNAdb (<http://lowelab.ucsc.edu/GtRNAdb/>) with indication (in red) of the pentamers shared with AL.

**Cladorhizidae\_sp\_MBARI\_D1340-BT2\_Csp\_MBARI\_tRNA-Gly-GCC-1-5 Sponge**

GCACT**GATG**GTTC**AGTGGTA**GAAATTCTCGC**CTGCCA**CGCGGGAGGCCCGGG**TTCAA**  
TTCCCGGTCAAGTCA

**Acetobacterium\_woodii\_DSM\_1030\_Acet\_wood\_DSM\_1030\_tRNA-Gly-GCC-1-2**  
Eubacteriaceae (species)

GCGGAAG**TGGCTCA****AGTGGTA**GAGCATCGCCT**TGCCA**AGGCGAGGGtCGCGAG**TTCA**  
**AATCTCGTCTTCCGCTCCA**

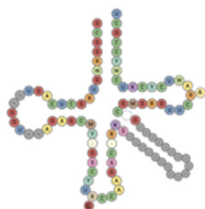

**Acidobacterium\_capsulatum\_ATCC\_51196\_Acid\_caps\_ATCC\_51196\_tRNA-Gly-GCC-1-1 Acidobacteria (species)**

GCGGGAG**TAGCTCA****AGTGGTA**GAGCATCGCCT**TGCCA**AGGCGAGGGtCGCGGG**TTCA**  
**AGTCCGTCTCCCGCTCCA**

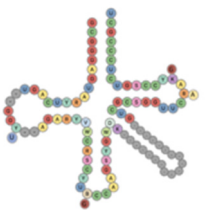

**Aciduliprofundum\_boonei\_T469\_Acid\_boon\_T469\_tRNA-Gly-GCC-1-1**  
Euryarchaeota

GCGGGTG**TGGTGTAGCC****TGGTA**ACACGAGGCC**CTGCCA**CGGCTTTGcCCCGGG**TTCA**  
**AAATCCCGGCACCCGCA**

**Agrobacterium\_fabrum\_str\_C58\_Agro\_fabr\_C58\_tRNA-Gly-GCC-1-1 Proteobacteria (species)**

GCGGGTG**TAGCTCA****AGG****GGTA**GAGCACAACCT**TGCCA**AGGTTGGGGtCGAGGG**TTCA**  
**AATCCCTTCGCCCCGCTCCA**

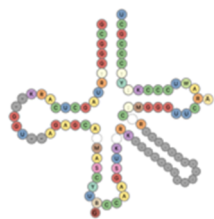

**Alkaliphilus\_metalliredigens\_QYMF\_Alka\_meta\_QYMF\_tRNA-Gly-GCC-1-1**  
**Clostridiaceae bacteria (species)**

GCGGAAG**T**GGCTC**A**GT**GGTA**GAGCATCGCCT**TGCCA**AGGCGAGGGtCGCGAG**TTCA**  
**A**ATCTCGTCTTCCGCTCCA

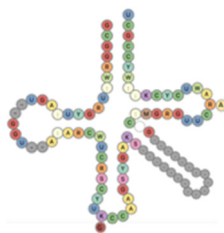

**Alligator\_mississippiensis\_Amiss4\_tRNA-Gly-GCC-4-2 Reptilia**

GCACTGG**T**GGTTC**AATGGTA**GAATTCCTGCT**TGCCA**TGCAGGGGaCCTGGG**TTCAAT**  
TCCCAGCCAGTGCA

**Aminobacterium\_colombiense\_DSM\_12261\_Amin\_colo\_DSM\_12261\_tRNA-Gly-GCC-1-1 Synergistota bacteria (species)**

GCGGAAG**T**AGCTC**A**GG**GGTA**GAGCACAACCT**TGCCA**AGGTTGGGGtCGCGGG**TTCA**  
**A**ATCCCGTCTTCCGCTCCA

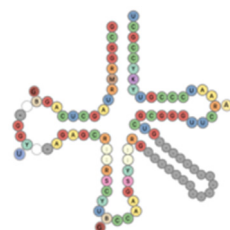

**Anaerobaculum\_mobile\_DSM\_13181\_Anae\_mobi\_DSM\_13181\_tRNA-Gly-GCC-1-1**  
GCGGAAG**T**AGCTC**A**GG**GGTA**GAGCACCACCT**TGCCA**AGGTGGGGGcCGCGGG**TTC**  
**AA**ATCCCGTCTTCCGCTCCA

**Anaeromyxobacter\_dehalogenans\_2CP-1\_Anae\_deha\_2CP\_1\_tRNA-Gly-GCC-1-1**  
GCGGGA**A**TAGCTCAG**TGGTA**GAGCATCGCCT**TGCCA**AGGCGAGGGtCGAGGG**TTCA**  
**A**ATCCCTTTTCCGCTCCA

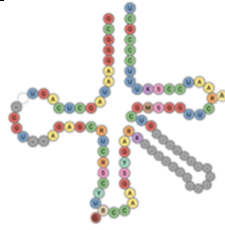

**Arabidopsis\_thaliana\_Athal10\_tRNA-Gly-GCC-3-1 Plant (species)**

GCACCAG**T**GGTCT**A**GT**G**GTAAGAATAGTACC**CTG**CCAACGGTACAGaCCCGGG**TTCAA**TTCCCGGCTGGTG  
CA

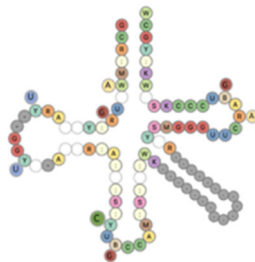

**Archaeoglobus\_fulgidus\_DSM\_4304\_Arch\_fulg\_DSM\_4304\_tRNA-Gly-GCC-1-1  
Euryarchaeota (species)**

GCGCCG**A**TGGTGTAGCCT**TG**GTAACACAGGGGCTTGCCGAGCCCC**CTG**CCCCGGG**TTCA**AATCCCGGTCGGCGCA

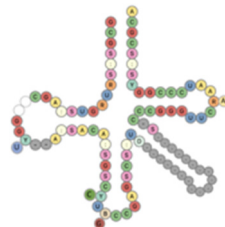

**Ascocoryne\_sarcoides\_NRRL\_50072\_Ascosarc\_NRRL\_50072\_tRNA-Gly-GCC-1-1  
Helotiaceae Fungus (species)**

GCGTCGG**T**GGTTT**A**GT**G**GTAATAATCCATCGT**TG**CCAaagaatTTCAAtt**TTCAAG**cTCG  
ATGGGcCCCGGGTTC

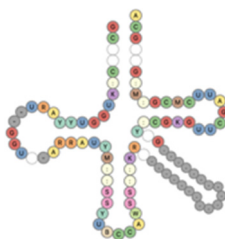

**Azospirillum\_sp\_B510\_Azos\_B510\_tRNA-Gly-GCC-2-1 Proteobacteria (genus)**

GTATTT**AAGCCAtTGGAA**aATAACAATGTAT**TGCCA**ATTCGTAATCAgtAgGtCCGGGGT**TCAA**ATCCCTGTTGCG

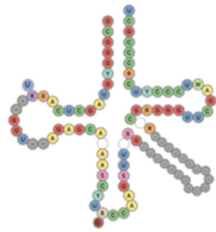

**Balaenoptera\_acutorostrata\_scammoni\_Bacut1\_tRNA-Gly-GCC-766-1**      **Mammals**  
(species)

GCATTGG**TG**GTTC**AGTGGTA**GAGTTCTTGC**CTGCCA**TGTGGGAGGCCAGGG**TTCAA**  
TTCCCCGCCAATGCA

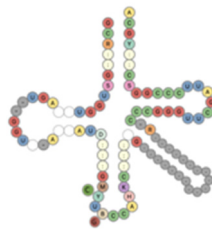

**Batrachochytrium\_dendrobatidis\_JAM81\_Batr\_dend\_JAM81\_tRNA-Gly-GCC-1-2**  
**Fungus (species)**

GCGCTAG**TG**GTTT**AGTGGTA**AAATTCATCGT**TGCCA**TCGATGAGcCCCCGG**TTCAATT**  
CCGGGCTAGCGCA

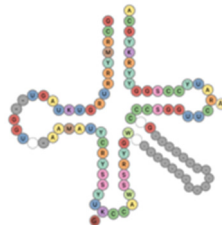

**Bipolaris\_sorokiniana\_ND90Pr\_Bipo\_soro\_ND90Pr\_tRNA-Gly-GCC-1-3**  
(species)

**Fungus**

CATCGG**TG**GTTT**AGTGGT**AAAATTAGCCGT**TGCCA**tccactctggtcc**TTCAA**aggtcccagctgg  
acaacgTCGGCT

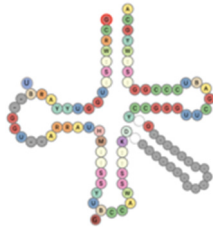

**Blattabacterium\_sp\_Blaberus\_giganteus\_BGIGA\_Blat\_Blaberus\_giganteus\_BGIGA\_**  
**tRNA-Gly-GCC-1-1 Bacteroidetes (genus)**

GCGAGA**AT**AGCTCAGT**TGGTA**GAGCACGACCT**TGCCA**AGGTCGGGGcCGCGGG**TTC**  
**AA**ATCCCGTTTCTCGCT

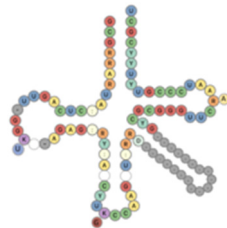

**Blochmannia\_endosymbiont\_of\_Camponotus\_Colobopsis\_obliquus\_757\_ tRNA-**  
**Gly-GCC-1-1 Gammaproteobacteria (species)**

GCGGGA**AT**AGCTCAGT**TGGTA**GAGTACAACCT**TGCCA**AGGTTGGGGtCGCGAG**TTCA**  
**AG**TCTCGTTTCCCGCT

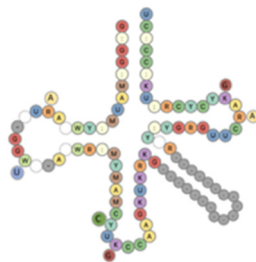

**Blumeria\_graminis\_f\_sp\_tritici\_96224\_Blum\_gram\_f\_tritici\_96224\_tRNA-Gly-**  
**GCC-7-1 Fungus (species)**

GGTTGGA**TG**GTGCGG**TGGTA**cATCATcttGGCTGg**CTGCCA**agtagagtctggatagcttggaca  
catatcccactcgAGaCAGTAGAtCGCTGG**TTCAA**ATCCAGC

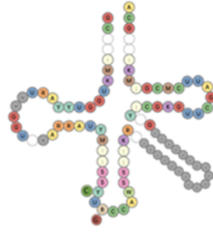

**Borrelia\_chilensis\_VA1\_Borr\_chil\_VA1\_tRNA-Gly-GCC-1-1 Spirochaetaceae bacteria**

GCGAAAG**T**AACTC**A**GG**GGTA**AGAGTGTACCT**TGCCA**AGGTGAAAGtCGCGGG**TTCAA**  
ATCCCGTCTTTCGCT

**Bos\_taurus\_Btaur9\_tRNA-Gly-GCC-3224-1 Mammals (assembly)**

TCCTAGG**T**GGCTC**AATGGTA**AAAATACTTGC**CTGCCA**aAGCAGGAGaCTCAGG**TTCA**  
**A**TCCCTGGTCCAGGAA

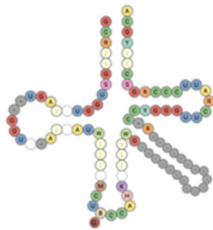

**Botrytis\_cinerea\_B0510\_Botr\_cine\_B05\_10\_tRNA-Gly-GCC-1-8 Fungus (species)**

GCGTTTGT**T**GTTT**A**GT**GGTA**AAATCCATCGT**TGCCA**tctatctcttctga**TTCAAG**aagagtgag  
aaacaac

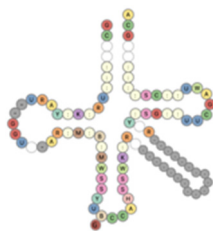

**Branchiostoma\_floridae\_Bflor2\_tRNA-Gly-GCC-2-1 Chordata**

GCATCGG**T**GGTTC**A**GT**GGTA**GAAATTCTCGC**CTGCCA**CGCGGGAGGCCCGGG**TTCAA**  
TTCCCGGCCGATGCA

**Buchnera\_aphidicola\_str\_5A\_Acyrtosiphon\_pisum\_Buch\_aphi\_5A\_Acyrtosiphon\_pisum\_tRNA-Gly-GCC-1-1 Gammaproteobacteria (species)**



GCGGGA**AT**AGCTCAGT**TGGT**AGAGCACAACT**TGCCA**AGGTTGGGGtCGCGAG**TTCA**  
**AG**TCTCGTTTCCCGCTCCA

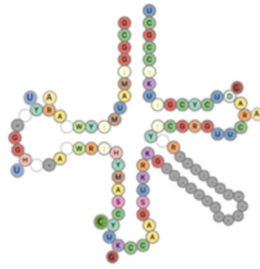

**Caenorhabditis\_brenneri\_Cbren3\_tRNA-Gly-GCC-5-1 Nematoda (assembly)**

GCATCGG**TGG**TTC**AGTGGT**AGAATGCTCGC**CTGCCA**CGCGGGCTGCCCGGG**TTCAA**  
 TTCCCGGTCGATGCA

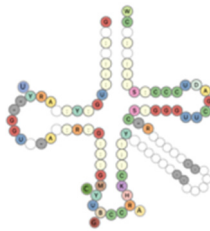

**Caldivirga\_maquilingensis\_IC-167\_Cald\_maqu\_IC\_167\_tRNA-Gly-GCC-1-1**  
**Thermoproteota archaea (species)**

GCGGCCGTAGTCTAGTC**tGGT**ttAGGATGGCGGC**CTGCC**GCGCCGCAGAtCCCGGG**TT**  
**CAA**ATCCCGGCGGCCGCA

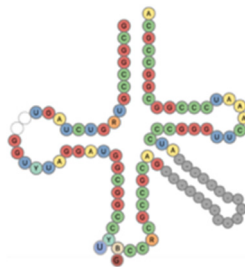

**Callithrix\_jacchus\_Cjacc3\_tRNA-Gly-GCC-4-1 Primates (species)**

GCATGGG**TGG**TTC**AGTGGT**AGAATTCTCGC**CTGCCA**CGCGGGAGtCCTGGG**TTCAAT**  
 CCCC GGCCCCACGCA

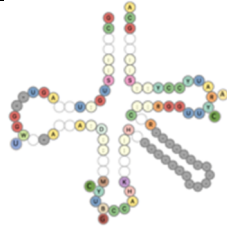

**Calothrix\_sp\_PCC\_7507\_Calo\_PCC\_7507\_tRNA-Gly-GCC-2-1 Cyanobacteria (genus)**

GCGGATG**TGGTGTAA**GGCAACACCGGAGT**TGCCA**AGCTCCAAaTGCGAG**TTCAA**  
CTCTCGTCGTCCGCT

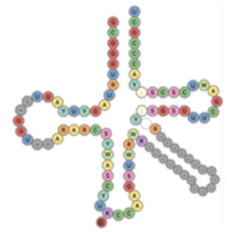

**Campylobacter\_jejuni\_subsp\_doylei\_26997\_Camp\_jezu\_doylei\_269\_97\_tRNA-Gly-GCC-2-1 Campylobacterota (species)**

GCGGGA**AT**AGCTC**AGG****GGTA**GAGCACAACCT**TGCCA**AGGTTGGGGtCGCGAG**TTCA**  
**AAT**CTCGCTAACCGCACCA

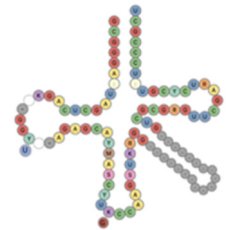

**Candidatus\_Azobacteroides\_pseudotrichonymphae\_genomovar\_CFP2 \_tRNA-Gly-GCC-1-1 Bacteroidetes**

GCGAAA**AT**AGCTCAGT**TGGTA**GAGTATAACCT**TGCCA**AGGTTAGGGtCGCGGG**TTCA**  
**AG**TCCCGTTTTTCGCT

**Candidatus\_Baumannia\_cicadellinicola\_BGSS\_Cand\_Baum\_cicadellinicola\_BGSS\_tRNA-Gly-GCC-1-1 Proteobacteria**

GCGGGA**AT**AGCTCAGT**TGGTA**GAGCACAACCT**TGCCA**AGGTTGGGGtCGCGAG**TTCA**  
**AAC**CTCGTTTCCCGCTCCA

**Candidatus\_Blochmannia\_chromaiodes\_str\_640\_Cand\_Bloc\_chromaiodes\_640\_tRNA-Gly-GCC-1-1 Gammaproteobacteria (genus)**

GCGGGA**AT**AGCTCAGT**TGGGA**GAGCACAACCT**TGCCA**AGGTTGGGGtCGCGAG**TTC**  
**AA**ATCTCGTTTCCCGCTCCA

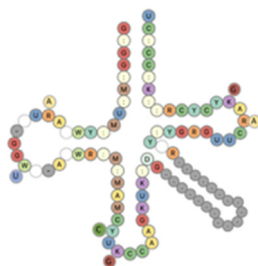

**Candidatus\_Caedibacter\_acanthamoebae\_Cand\_Caed\_acanthamoebae\_tRNA-Gly-GCC-1-1 Gammaproteobacteria**

GCGGGCGT**AGCTCAGG****GGTAG**AGCACAACT**TGCCA**AGGTTGGGGtCGAGGG**TTCA**  
**AATCCCTTCG**CCCGCTCCA

**Candidatus\_Caldiarchaeum\_subterraneum\_Cand\_Cald\_subterraneum\_tRNA-Gly-GCC-1-1 Aigarchaeota**

GCGGCGGT**CGTCTAGCCTGGTA**AGGACACCAGC**CTGCCA**CGCTGGGAGtCGCGGG**TT**  
**CAA**ATCCCGCCCGCCGCA

**Candidatus\_Carsonella\_ruddii\_DC\_Cand\_Cars\_ruddii\_DC\_tRNA-Gly-GCC-1-1 Gammaproteobacteria**

GCGAAAGTATCTT**AATGGTA**AAGTATCACCT**TGCCA**TGGTGAAAGtTGCGAG**TTCAAG**  
TCTCGTCTTT**CGCT**

**Candidatus\_Cloacimonas\_acidaminovorans\_str\_Evry\_Cand\_Cloa\_acidaminovorans\_Evry\_tRNA-Gly-GCC-2 Cloacimonetes bacteria**

GCGGGA**ATAGCTCAGTTGG**CAGAGCGCAACCT**TGCCA**AGGTTGAAGtCGCGGG**TTC**  
**AA**ACCCCGTTTCCCGCTCCA

**Candidatus\_Endolissoclinum\_faulkneri\_L5\_Cand\_Endo\_faulkneri\_L5\_tRNA-Gly-GCC-1-1 Alphaproteobacteria**

GCGGGCGT**AGCTCAGTGGTA**GAGCACAACT**TGCCA**AGGTTGGGGtCGTGAG**TTCA**  
**AG**TCTCATCGTCCGCTCCA

**Candidatus\_Korarchaeum\_cryptofilum\_OPF8\_Cand\_Kora\_cryptofilum\_OPF8\_tRNA-Gly-GCC-1-1 Korarchaeota**

GCGGCCGT**AGTCTAGCCTGG**AcAGGATGGGGGC**CTGCCA**CGTCCCAGACCCGGG**TT**  
**CAA**ATCCCGGCGGGCCGCA

**Candidatus\_Koribacter\_versatilis\_Ellin345\_Cand\_Kori\_versatilis\_Ellin345\_tRNA-Gly-GCC-1-1 Acidobacteriota**

GCGGGAGTAACTC**AGTGGTA**AGAGTGCGACCT**TGCCA**AGGTCGAAGtCGCGGG**TTCA**  
**AATCCCGTCTCC**CGCTCCA

**Candidatus\_Methylomirabilis\_oxyfera\_Cand\_Meth\_oxyfera\_tRNA-Gly-GCC-1-1**  
**Methylomirabilota bacteria**

GCGGGA**AT**AGCTC**AGC****GGTA**GAGCATCGCCT**TGCCA**AGGCGAGGGtCGCGGG**TTCA**  
**AAT**CCCGTTTCCCGCTCCA

**Candidatus\_Nasuia\_deltoccephalinicola\_str\_NAS-ALF\_tRNA-Gly-GCC-1-1**  
**Betaproteobacteria**

GGGTAGCT**TTAATGGTA**AAGCGTAACTT**TGCCA**AAAGTTGAGAtTGCGAG**TTCAA**ATCTC  
GTCCCTT

**Candidatus\_Sulcia\_muelleri\_CARI\_Cand\_Sulc\_muelleri\_CARI\_tRNA-Gly-GCC-1-1**  
**Bacteroidota**

GCGAGA**AT**AGCTCATT**TGGTA**GAGTACTACCT**TGCCA**AGGTAG**TGGTA**GCGGG**TTCA**  
**AAT**CCCGTTTCTCGCT

**Candidatus\_Zinderia\_insecticola\_CARI\_Cand\_Zind\_insecticola\_CARI\_tRNA-Gly-GCC-1-1**  
**Betaproteobacteria**

GCGAAAG**T**AGCTCA**ATTGGTA**GAGCAATACCT**TGCCA**AGGTATAGGtTGAGAG**TTCAA**  
AACTCTTCTTTGCT

**Cavia\_porcellus\_Cporc3\_tRNA-Gly-GCC-204-1 Mammals (species)**

GcGTATCT**TCAGTGGTA**GAATACTTGCC**CTGCCA**TGCACAAAGcTCTGGG**TTCAA**ATTCCT  
AGCATtgCA

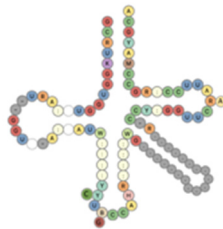

**Ceratodon\_purpureus\_GG1\_Cpurp\_GG1\_1\_tRNA-Gly-GCC-9-1 Bryophyta**

GGGttt**ATG**TCT**AGTGGTA**GAATAGTACC**CTGCCA**CGGTACAGaCCCGGG**TTCAA**ATTC  
CCGGCCGGTGCA

**Ceratodon\_purpureus\_R40\_Cpurp\_R40\_1\_tRNA-Gly-GCC-3-1 Bryophyta**

GCGGAA**T**AGCTT**AATGGTA**GAGTATAGCCT**TGCCA**AGGCTGAGGtTGAGGG**TTCAA**  
GTCCCTTTTCCGCT

**Chara\_braunii\_S276\_Cbrau1\_tRNA-Gly-GCC-11-1 Viridiplantae**

GTGGAA**AT**AGCTT**AATGGTA**GAGTATAGCCT**TGCCA**AGGCTAAGGtTGAGGG**TTCAA**  
ATCCCTTTTCCGCT

**Chlamydia\_muridarum\_MopnTet14\_Chla\_muri\_MopnTet14\_tRNA-Gly-GCC-1-1**  
**Chlamydiota bacteria (species)**

GCGGGTGTAGCTCAGTGGTAGAGCGCCACGTTGCCAACGTGAAGGtCGTGAGTTCA  
AGCCTCATCACCCGCT

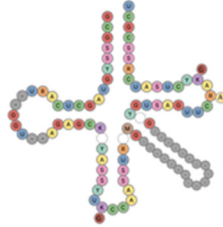

**Chlamydophila\_abortus\_AB7\_Chla\_abor\_AB7\_tRNA-Gly-GCC-1-1** **Chlamydiota bacteria**

GCGGGTGTAGCTCAGTGGTAGAGCGCCACGTTGCCAACGTGAAGGtCGTGAGTTCA  
AGCCTCATCACCCGCT

**Choloepus\_hoffmanni\_Choff2\_tRNA-Gly-GCC-2-1 Mammals**

GCATTGGTGGTTCAGTGGTAGAATTCTCGCCTGCCACGCGGGAGGCCCGGGTTCAA  
TTCCCGGCCAATGCA

**Chrysemys\_picta\_bellii\_Cpict2\_tRNA-Gly-GCC-24-1 Reptilia turtle (species)**

GCATTGGTGGTTCAGTGGTAGAACTCTCCCCTGCCACGTGGGAGGCCTAGATTCAAT  
TCCCAACCAGTATA

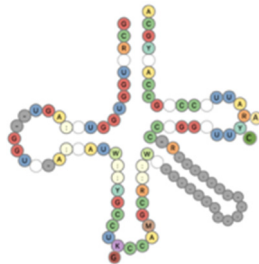

**Cladorhizidae\_sp\_MBARI\_D1340-BT2\_Csp\_MBARI\_tRNA-Gly-GCC-1-1**  
**Demospongiae**

GCACTGATGGTTCAGTGGTAGAATTCTCGCCTGCCACGCGGGAGGCCCGGGTTCAA  
TTCCCGGTCAGTGCA

**Closterium\_sp\_NIES-67\_Clost1\_tRNA-Gly-GCC-5-1 Charophyta**

GTGCGCTGTTTAGTGGTAGAATAGCACCTGCCAtgtgccCGGTGCAGaCCTGGGTTCA  
ATTCCCGGCTGGCACA

**Clostridium\_kluyveri\_DSM\_555\_Clos\_kluy\_DSM\_555\_tRNA-Gly-GCC-2-1**  
**Eubacteriales (species)**

GCGGGAGTGCTCAGTGGTAGAGCGTCACCTGCCAAGGTGAACGtCGCGGGTTCA  
AATCCCGTCTTCCGCTCCA

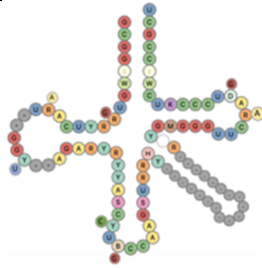

**Corallococcus coralloides\_DSM\_2259\_Cora\_cora\_DSM\_2259\_tRNA-Gly-GCC-1-2**  
**Myxococcales bacteria (species)**

GCGGGA**AT**AGCTC**AGC****GGTA**GAGCATCGCCT**TGCCA**AGGCGAGGGtCGAGGG**TTCA**  
**A**  
 ATCCCTTTTCCCGCTCCA

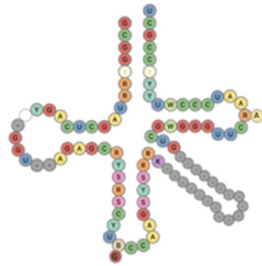

**Cricetulus griseus\_Cgris1\_tRNA-Gly-GCC-301-1 Mammals (halmster) (species)**

TCTTGGT**TG**CAGCTC**AGT****TGGTA**AAGCATTAG**CTGCCA**TTTGCAAGGcTTTGG**ATTCA**  
**A**TCCCCAgGACTAAGAA

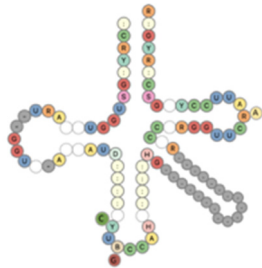

**Curvularia lunata\_CX-3\_Curv\_luna\_CX\_3\_tRNA-Gly-GCC-1-5 Fungus (species)**

GCATCGG**TG**GTTT**AGT****TGGTA**AAATTAGCCGT**TGCCA**ttCATCTG**TTCAA**ttGATTcAC  
 TTCACAGAACAGCATGAG

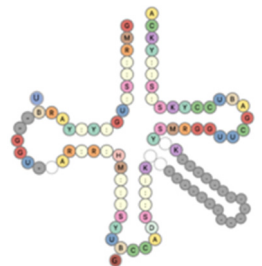

**Cylindrospermum stagnale\_PCC\_7417\_Cyli\_stag\_PCC\_7417\_tRNA-Gly-GCC-2-1**  
**Cyanobacteria (species)**

GGAAGTGG**T**AGCTCA**ACT****TGGA**AGAGCGCTCGACA**GCCA**ATCGGGAGGtTGTGAG**TTC**  
**AAG**TCTCACCCCTTCCA

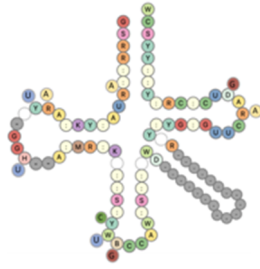

**Dactylellina\_haptotyla\_CBS\_20050\_Dact\_hapt\_CBS\_200\_50\_tRNA-Gly-GCC-2-1**  
Fungus (species)

GCGTTTGT**GTGTTT****AGTGGTA**AAATTCGTCGT**TGCCA**TTCAAtaatgataTCGACGAGcCCC  
GGG**TTCAA**TTCCCGG

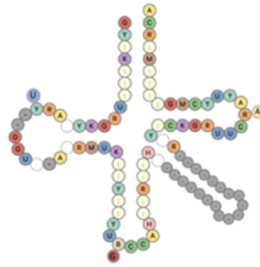

**Danio\_rerio\_Dreri11\_tRNA-Gly-GCC-15-1** Fish

GCATTGGT**GTGTTCA****GTGGTA**GAATTCTCGC**CTGCCA**CGCGGGAGaCCCGGG**TTCAA**  
TTCCCGGCTAATGCA

**Dasypus\_novemcinctus\_Dnove3\_tRNA-Gly-GCC-10902-1** Mammals (armadillo)  
(species)

GCaTGGGT**GTGTTCA****GTGGTA**GAATTCTCAC**CTGCCA**CACAGGAGGCCCCAGG**TTCAA**  
**G**TCCCAGCCAAGCAC

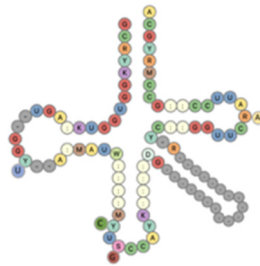

**Desulfarculus\_baarsii\_DSM\_2075\_Desu\_baar\_DSM\_2075\_tRNA-Gly-GCC-1-1**  
Thermodesulfobacteriota (species)

GCGGGAG**T**AACTCAGAGGTAGAGTGCAACCT**TGCCA**AAGTTGAAGiCGCGGG**TTCAA**  
CTCCCGTCTCCCGCTCCA

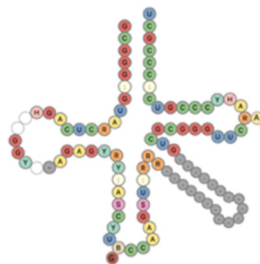

**Desulfatibacillum\_alkenivorans\_AK-01\_Desu\_alke\_AK\_01\_tRNA-Gly-GCC-1-1**  
**Desulfatibacillum**

GCGGGA**AT**AACTC**AGTGGTA**AGAGTGCGACCT**TGCCA**AGGTCGAAGtCGCGGG**TTCA**  
**AATCCCGTTTCCCGCTCCA**

**Desulfobacterium\_autotrophicum\_HRM2\_Desu\_auto\_HRM2\_tRNA-Gly-GCC-1-2**  
**Thermodesulfobacteriota (species)**

GCGGGA**AT**AACTC**AGTGGTA**AGAGTGCGACCT**TGCCA**AGGTCGAAGtCGCGGG**TTCA**  
**AATCCCGTTTCCCGCTCCA**

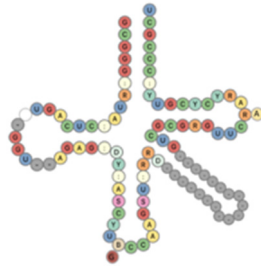

**Thermodesulfobacteriota (species)**

GCGGGA**AT**AACTC**AGTGGTA**AGAGTGCGACCT**TGCCA**AGGTCGAAGtCGCGGG**TTCA**  
**AATCCCGTTTCCCGCTCCA**

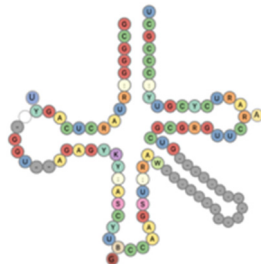

**Desulfococcus\_oleovorans\_Hxd3\_Desu\_oleo\_Hxd3\_tRNA-Gly-GCC-1-1**  
**Thermodesulfobacteriota (species)**

GCGGGA**AT**AACTC**AGTGGTA**AGAGTGCGACCT**TGCCA**AGGTCGAAGtCGCGGG**TTCA**  
**AATCCCGTTTCCCGCTCCA**

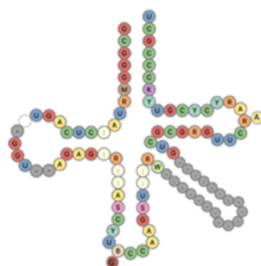

**Desulfohalobium\_retbaense\_DSM\_5692\_Desu\_retb\_DSM\_5692\_tRNA-Gly-GCC-1-1**  
**Thermodesulfobacteriota (species)**



GCGGGAGTAACTCAGTGGTAGAGTGCAACCTTGCCAAGGTTGAAGtCGCGGGTTCAA  
ATCCCGTCTCCCGCTCCA

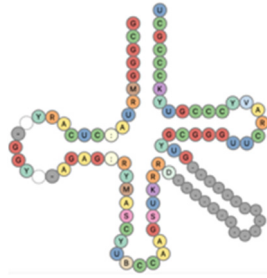

**Desulfomicrobium\_baculatum\_DSM\_4028\_Desu\_bacu\_DSM\_4028\_tRNA-Gly-GCC-1-1**  
**Desulfomicrobiaceae bacteria (species)**

GCGGGAGTAACTCAGTGGTAGAGTGCAACCTTGCCAAGGTTGAAGtCGCGAGTTCAA  
ATCTCGTTTCCCGCTCCA

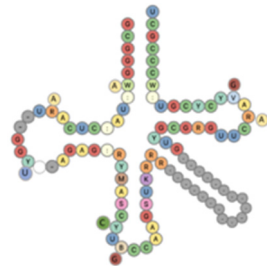

**Desulfomonile\_tiedjei\_DSM\_6799\_Desu\_tied\_DSM\_6799\_tRNA-Gly-GCC-1-1**  
**Desulfomonilaceae bacteria (species)**

GCGGGAATAACTCAGTGGTAGAGTGCAACCTTGCCAAGGTTGAAGtCGCGGGTTCAA  
ATCCCGTTTCCCGCTCCA

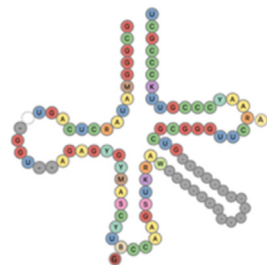

**Desulfovibrio\_africanus\_str\_Walvis\_Bay\_Desu\_afri\_Walvis\_Bay\_tRNA-Gly-GCC-1-1**  
**Thermodesulfobacteriota (species)**

GCGGGAATAACTCAGTGGTAGAGTGCAACCTTGCCAAGGTTGAAGtCGCGGGTTCAA  
ATCCCGTTTCCCGCTCCA

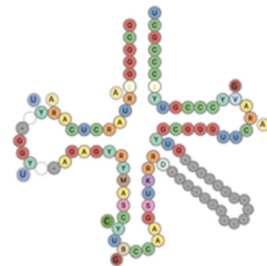

**Desulfurella\_acetivorans\_A63\_Desu\_acet\_A63\_tRNA-Gly-GCC-1-1**  
**Campylobacteriota (species)**

GCGGGA**AT**AGCTCAGT**TGGTA**GAGCACAACCT**TGCCA**AGGTTGGGGtCGCGGG**TTC**  
**AAG**TCCCGTTTCCCGCTCCA

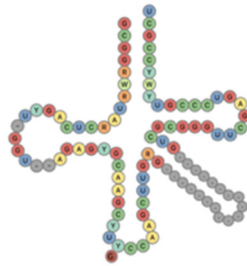

**Desulfurobacterium\_thermolithotrophum\_DSM\_11699\_Desu\_ther\_DSM\_11699\_tRN**  
**A-Gly-GCC-2-1 Desulfurobacteriales (species)**

GCGGGCG**T**AGCTCAGT**TGGTA**GAGCGAAACCT**TGCCA**AGGTTTAGGtCGCGGG**TTCA**  
**AG**TCCCGTCGCCCGCTCCA

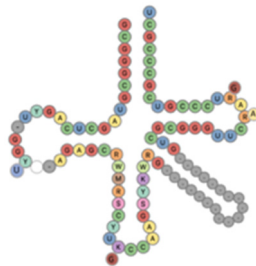

**Dictyoglomus\_thermophilum\_Dict\_ther\_H\_6\_12\_ATCC\_35947\_tRNA-Gly-GCC-1-1**  
**Dictyoglomota bacteria (species)**

GCGGGAG**T**AGCTC**AGG****GGTA**GAGCGTCTCCT**TGCCA**AGGAGAAGGcCGCGGG**TTCA**  
**AAT**CCCGTCTCCCGCTCCA

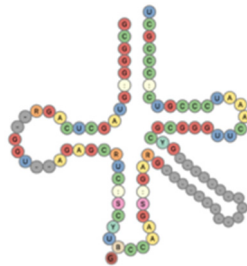

**Dipodomys\_ordii\_Dordi2\_tRNA-Gly-GCC-1-1 Mammals (rat) (species)**

GCATGGG**T**GGTTC**AG****TGGTA**GAATTTTGC**CTGCCA**CACAGGAGGCCTGGG**TTCAAT**  
 TTCCAGCCCATGAA

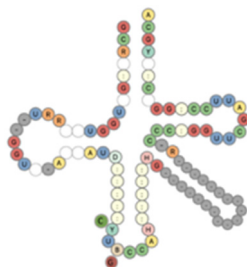

**Dokdonia\_sp\_4H-3-7-5\_Dokd\_4H\_3\_7\_5\_tRNA-Gly-GCC-1-1 Bacteroidota**

GCGAAAG**T**AGCTCAGGGGTAGAGCATCACCT**TGCCA**AGGTGGGGGtCGCGAG**TTCA**  
**A**ATCTCGTCTTTCGCT

**Drechslerella\_stenobrocha\_248\_Drec\_sten\_248\_tRNA-Gly-GCC-1-1 Fungus (species)**

GCGTTTGT**TG**GTTTAG**TGGTA**AAATTCATCGT**TGCCA**t**CTGCC**tccgcaggtcaagTTCGATG  
AGcCCCGGG**TTCAA**TTCCCGGCAGACGCA

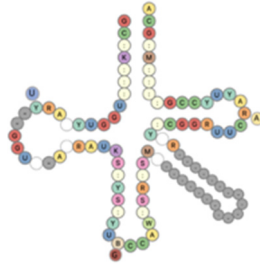

**Echinops\_telfairi\_Etelf2\_tRNA-Gly-GCC-394-1 Plant Asteraceae**

CCCTGG**T**AGCACAG**TGGTA**ACAGCATTGG**CTGCCA**TCCagAAAAGtCAGTGG**TTCAA**  
ACCCACCagcctcTCAGTGGA

**Erinaceus\_europaeus\_Eeuro2\_tRNA-Gly-GCC-3-1 Mammals (hedgehog) (species)**

ACATGGG**TG**GATCAG**TGGTA**GAATTCTTTC**CTGCCA**TGCGGGAGGCCCAGG**TTCAAT**  
TCCCGGCTCATGCA

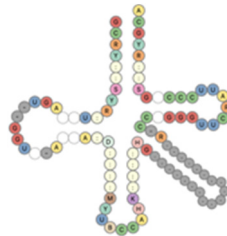

**Erysipelothrix\_rhusiopathiae\_SY1027\_Erys\_rhus\_SY1027\_tRNA-Gly-GCC-1-1 Bacillota (species)**

GCAGGTG**T**AGTTC**AATGGTA**GAACACGACCT**TGCCA**AGGTTGAGGCGGGGG**TTCAA**  
TTCCCTCACCTGCTCCA

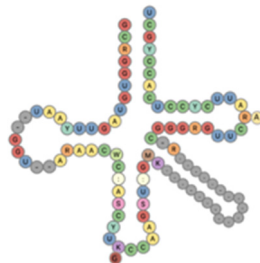

**Eubacterium\_acidaminophilum\_DSM\_3953\_Euba\_acid\_DSM\_3953\_tRNA-Gly-GCC-1-1 Bacillota**

GCGGAAG**TG**GCTCAG**TGGTA**GAGCATCGCCT**TGCCA**AGGCGAGGGtCGCGGG**TTCA**  
**A**ATCCCGTCTTCCGCTCCA

**Exophiala\_mesophila\_CBS\_40295\_Exop\_meso\_CBS\_40295\_tRNA-Gly-GCC-1-1**  
**Fungus (species)**

GCATTGT**TGG**TTTAG**TGGT**AAAAT**CTGCC**GT**TGCCA**gtttccttaacaggtctact**TTCAA**tgTC  
 GGCAGGcCCCGTGTTTCGATTCACGGACAATGCA

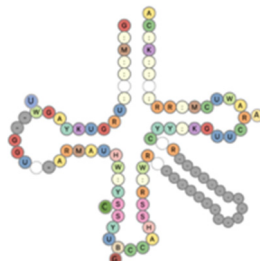

**Faecalitalea\_cylindroides\_T2-87\_Faec\_cyli\_T2\_87\_tRNA-Gly-GCC-1-1**  
**Firmicutes bacteria (species)**

GCAGATGTAGTTC**AATGGTA**GAACACAGCCT**TGCCA**AGGCTGATaCGGGGG**TTCAAT**  
 TCCCCTCATCTGCTCCA

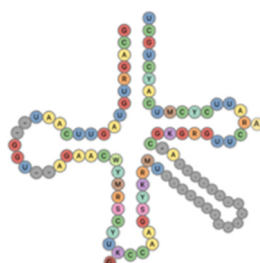

**Fervidicoccus\_fontis\_Kam940\_Ferv\_font\_Kam940\_tRNA-Gly-GCC-1-1**  
**Proteoarchaeota**

GCGGCGGT**TCGTCTAGCC****TGG**AtcAGGACGCCGGC**CTGCCA**CGTCGGAAAtCCCGGGT  
**TCAA**ATCCCGGCCGCCGCA

**Fistulina\_hepatica\_ATCC\_64428\_Fist\_hepa\_ATCC\_64428\_tRNA-Gly-GCC-2-1**  
**Fungus (species)**

GCATT**ATG**GGGTAG**TGGTA**ACCTGGGT**CGTTGCCA**tagggattgagcaccacttgTCGACC  
 CGcCGGGGG**TTCAA**TTCCCCCTTAATGCA

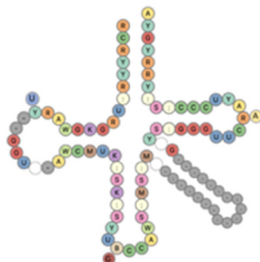

**Formosa\_agariphila\_KMM\_3901\_Form\_agar\_KMM\_3901\_tRNA-Gly-GCC-1-1**  
**Bacteroidota (species)**

GCGAAAGTAGCTC**AGG****GGTA**GAGCATCACCT**TGCCA**AGGTGAGGGtCGCGGG**TTCA**  
**AATCCCGTCTTT**CGCT

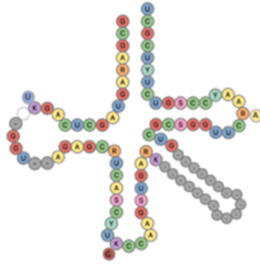

**Geobacillus\_sp\_Y41MC1\_Geob\_Y4\_1MC1\_tRNA-Gly-GCC-3-1 Bacillota (genus)**

GCGGAAGTAGTTCAGTGGTAGAACACCACCTTGCCAAGGTGGGGGtCGCGGGTTCA  
AGTCCCGTCTTCCGCT

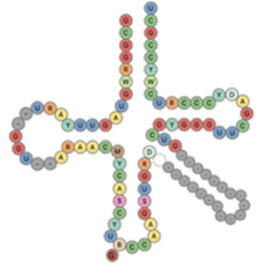

**Geospiza\_fortis\_Gfort1\_tRNA-Gly-GCC-1-1 Aves (species)**

GCATTGGTGGTTCAGTGGTAGAATTCTCGCTTGCCACGCAGGAGGCCAGGGTTCAA  
TTCCTGACCAAAGCA

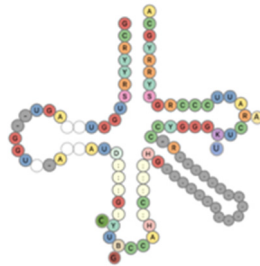

**Glycine\_max\_Williams\_82\_Gmax2.1\_tRNA-Gly-GCC-1-1 Plant (soybean) (species)**

GTTGTTGTAGTATAGTGATaAGTATTTTCCCCTGCCACGGGAACGaTCCGGATTCAAT  
CCCCGGCAACGgggggttcACT

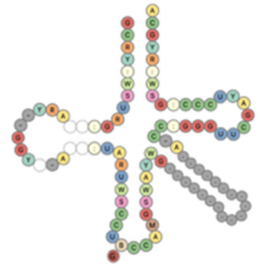

**Gossypium\_raimondii\_Graim2\_tRNA-Gly-GCC-5-1 Plant (cotton) (species)**

GCGGAAATAGCTTAATGGTAGAGCATAGCCTTGCCAAGGCTGAGGtGAGGGTTCAA  
GTCCCTCCTTCCGCT

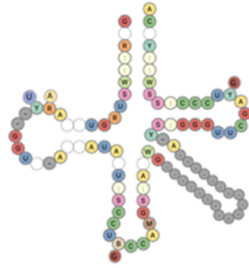

**Halalkalicoccus\_jeotgali\_B3\_Hala\_jeot\_B3\_tRNA-Gly-GCC-1-1** Halobacteriaceae  
archaea (species)

GCGCTGG**T**AGTGT**AGTGGTA**TCACGTGACCT**TGCCA**TGGTCACAaCCTGGG**TTCAA**A  
TCCCAGCCAGCGCA

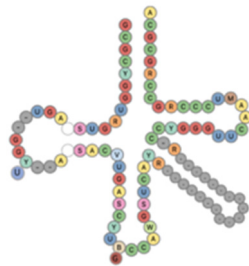

**Halanaerobium\_hydrogeniformans\_Hala\_hydr\_tRNA-Gly-GCC-1-2** Halanaerobiaceae  
bacteria (species)

GCGGGAG**T**AGCTC**AGTGGTA**GAGCATCACGT**TGCCA**ACGTGAGGGtCGCGAG**TTCA**  
**A**ATCTCGTTTCCCGCTCCA

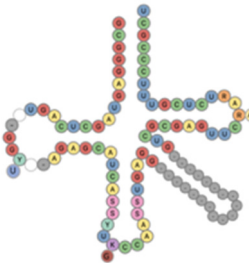

**Haloarcula\_hispanica\_ATCC\_33960\_CGMCC\_12049\_tRNA-Gly-GCC-1-1**  
Halobacteriales archaea (species)

GCGCTGG**T**AGTGTAGT**TGGTA**TCACGTGACCT**TGCCA**TGGTCACAaCCTGGG**TTCAA**  
ATCCCAGCCAGCGCA

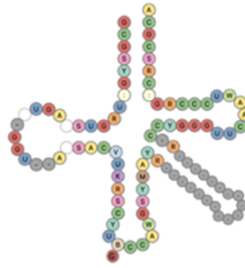

**Halobacterium\_salinarum\_R1\_DSM\_671\_Halo\_sali\_R1\_DSM\_671\_tRNA-Gly-GCC-1-1 Halobacteriales archaea (species)**

GCGCTGGTAGTGTAGTGGTATCACGTGACCTTGCCATGGTCACAaCCTGGGTTCAAATCCCAGCCAGCGCA

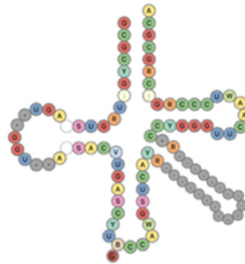

**Halodesulfovibrio\_sp\_MK-HDV\_Halo\_MK\_HDV\_tRNA-Gly-GCC-1-1 Proteobacteria**

GCGGGAATAACTCAGTGGTAGAGTACAACCTTGCCAGGTTGGAGtCGCGAGTTCAATATCTCGTTTCCCGCTCCA

**Haloferax\_mediterranei\_ATCC\_33500\_CGMCC\_12087\_Halo\_medi\_ATCC\_33500\_CGMCC\_1\_2087\_tRNA-Gly-GCC-2-1 Euryarchaeota (species)**

GCGCTGGTAGTGTAGTGGTATCACGTGACCTTGCCATGGTCACAaCCTGGGTTCAAATCCCAGCCAGCGCA

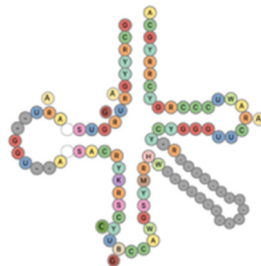

**Halogeometricum\_borinquense\_DSM\_11551\_PR\_3\_Halo\_bori\_DSM\_11551\_PR\_3\_tRNA-Gly-GCC-1-2 Euryarchaeota (species)**

GCGCTGGTAGTGTAGTGGTATCACGTGACCTTGCCATGGTCACAaCCTGGGTTCAAATCCCAGCCAGCGCA

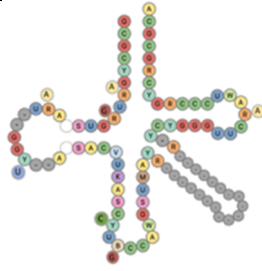

**Halomicrobium\_mukohataei\_DSM\_12286\_Halo\_muko\_DSM\_12286\_tRNA-Gly-GCC-1-1 Halomicrobium (genus)**

GCGGTGGT**T**AGTGT**AGTGGTA**TCACAGGACC**CTGCCA**CGGTCCTAaCGGGGG**TTCAA**  
ATCCCCCCCACCGCA

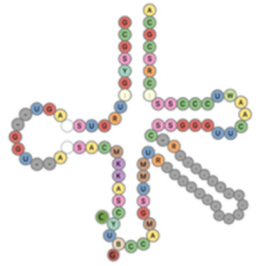

**Halomonas\_sp\_KO116\_Halo\_KO116\_tRNA-Gly-GCC-2-1 Proteobacteria (genus)**

GCGGGA**AT**AGCTC**AGTGGTA**GAGCATCGCCT**TGCCA**AGGCGAGGGiCGGGAG**TTCA**  
**A**ATCTCCTTTCCCGCTCCA

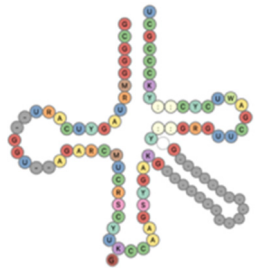

**Haloquadratum\_walsbyi\_C23\_Halo\_wals\_C23\_tRNA-Gly-GCC-1-1 Euryarchaeota (species)**

GCGCTGGT**T**AGTGT**AGTGGTA**TCACGTGACCT**TGCCA**TGGTCACAaCCCGGG**TTCAA**A  
TCCCGGCCAGCGCA

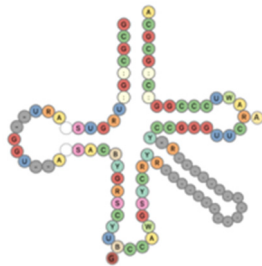

**Halorhabdus\_tiamatea\_SARL4B\_Halo\_tiam\_SARL4B\_tRNA-Gly-GCC-1-1 Euryarchaeota (species)**



GCGACGGTGGTGTAGTGGTATCACAGGACCCTGCCACGGTCCTAaCCCGAGTTCAA  
ATCTCGGCCGTCGCA

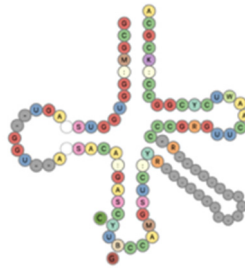

**Halorubrum\_lacusprofundi\_ATCC\_49239\_Halo\_lacu\_ATCC\_49239\_tRNA-Gly-GCC-1-2 Euryarchaeota (species)**

GCACCGGTAGTGTAGTGGTATCACGCAACCTTGCCATGGTTGCAaCCCGAGTTCAA  
TCTCGGCCGGTGCA

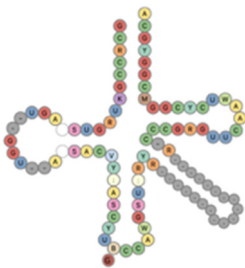

**Halostagnicola\_larsenii\_XH-48\_Halo\_lars\_XH\_48\_tRNA-Gly-GCC-1-1 Euryarchaeota (species)**

GCGTTGGTAGTGTAGTGGTATCACGTGACCTTGCCATGGTCACAaCCTGGGTTCAA  
TCCCAGCCAACGCA

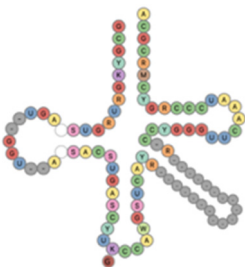

**Haloterrigena\_turkmenica\_DSM\_5511\_Halo\_turk\_DSM\_5511\_tRNA-Gly-GCC-1-2 Euryarchaeota (species)**

GCGCTGGTAGTGTAGTGGTATCACGTGACCTTGCCATGGTCACAaCCGGGGTTCAA  
TCCCCGCCAGCGCA

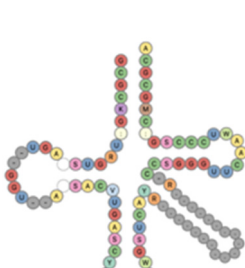

**Halovivax\_ruber\_XH-70\_Halo\_rube\_XH\_70\_tRNA-Gly-GCC-1-1 Euryarchaeota**

GCGCTGGTAGTGTAGTGGTATCACGTGACCTTGCCATGGTCACAaCCTGGGTTCAA  
TCCCAGCCAGCGCA

**Heterocephalus\_glaber\_Hglab2\_tRNA-Gly-GCC-3-1 Mammals (rat) (species)**

GCATTGGTGGTTCAGTGGTAGAATTCTCGCCTGCCACGAGGGAGGCCCGGGTTCAA  
TTCCCAGCCAATGCA

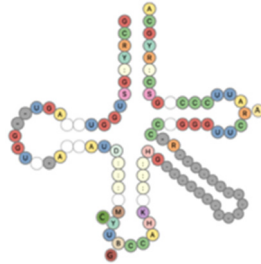

**Hyperthermus\_butylicus\_DSM\_5456\_Hype\_buty\_DSM\_5456\_tRNA-Gly-GCC-1-1 Crenarchaeota (species)**

GCGGCGGTTCGTCTAGCCTGGActAGGACGCCGGCCTGCCAAGCCGGCGAtCCCGGG  
TTCAAATCCCGGCCGCGCACCA

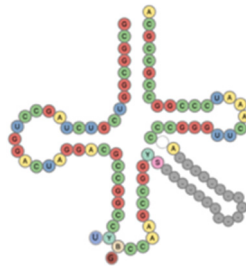

**Ignicoccus\_hospitalis\_KIN4I\_Igni\_hosp\_KIN4\_I\_tRNA-Gly-GCC-1-1 Crenarchaeota (species)**

GCGGCGGTTCGTCTAGCCTGGActAGGACGCCGGCCTGCCACGCCGGAGAtCCCGGG  
TTCAAATCCCGGCCGCGCACCA

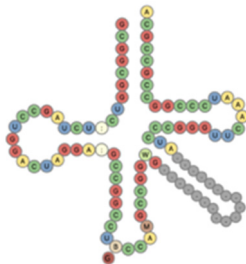

**Ignisphaera\_aggregans\_DSM\_17230\_Igni\_aggr\_DSM\_17230\_tRNA-Gly-GCC-1-1 Crenarchaeota**

GCGGCGGTTCGTCTAGCCTGGTctAGGACGCCGGCCTGCCAAGCCGGAGAtCCCGGGT  
TCAAATCCCGGCCGCGCACCA

**Isosphaera\_pallida\_ATCC\_43644\_Isos\_pall\_ATCC\_43644\_tRNA-Gly-GCC-1-1 Planctomycetota bacteria (species)**

GCGGGAGTAGCTCAGGGGTAGAGCGCCACGTGCCAAACGTGGTTGtCGTGGGTTCAA  
AATCCCATCTCCCGCT

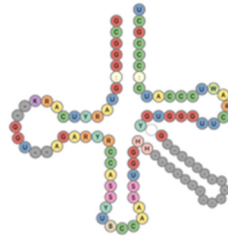

**Laccaria\_bicolor\_S238N-H82\_Lacc\_bico\_S238N\_H82\_tRNA-Gly-GCC-4-1 Fungus (species)**

GCATTATG GGGT AGTGGTAACCTGGGTCATTGCCA tgaggattcatatctgttggtttacctataT  
TGACCTGcTGGGGGTTCAATTCCCTCTTAATGCA

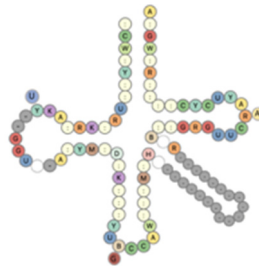

**Lacinutrix\_sp\_5H-3-7-4\_Laci\_5H\_3\_7\_4\_tRNA-Gly-GCC-1-1 Flavobacteriaceae**

GCGAAAGTAGCTCAGGGGTAGAGCATCACCTGCCAAGGTGGAGGtCGTGGGTTCAA  
AATCCCATCTTTCGCT

**Lactobacillus\_helveticus\_DPC\_4571\_Lact\_helv\_DPC\_4571\_tRNA-Gly-GCC-3-1 Firmicutes bacteria (species)**

GCGGAAGTAGTTCAGTGGTAGAACATCACCTGCCATGGTGGGGGtCGCGGGTTCAA  
ATCCCGTCTTCCGCT

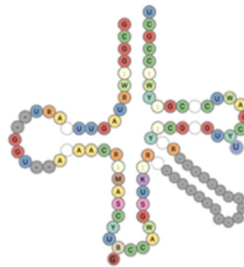

**Latimeria\_chalumnae (coelacanth)\_Lchal1\_tRNA-Gly-GCC-3-1 Fish (species)**

GCATTGGTGTTTCAGTGGTAGAATTCTCGCCTGCCACGCGGGAGaCCCGGGTTCAA  
TTCCCGGCCAATGCA

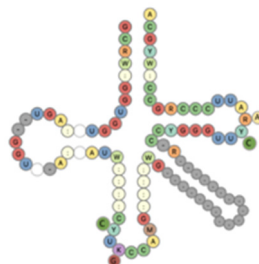

**Lawsonia\_intracellularis\_N343\_Laws\_intr\_N343\_tRNA-Gly-GCC-1-1 Plant (magnoliophyta) (species)**

GCGGGAGTAACTCAGTGGTAGAGTGCAACCTTGCCAAGGTTGAAGtCGCGGGTTCAA  
ATCCCGTCTCCCGCTCCA

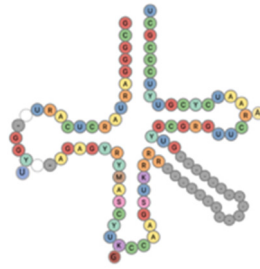

**Leptospira\_biflexa\_serovar\_Patoc\_strain\_Patoc\_1\_Ames\_tRNA-Gly-GCC-1-1**  
**Spirochaetae bacteria (species)**

GCGGGAATAGCTCAGCGGTAGAGCATCTCCTTGCCAAGGAGAGGGtCGCGGGTTCA  
AGTCCCGTTTCCCGCT

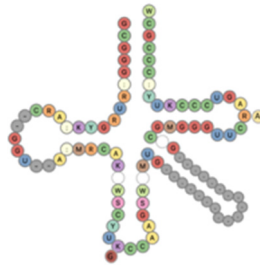

**Loxodonta\_africana\_Lafri3\_tRNA-Gly-GCC-6-1 Mammals (elephant) (species)**

GCGTTGGTGGTCCAGTGGTAGAATTCTTGCCCTGCCATGCAGGAGGCCCAGGTTCAA  
TTCCTGGCCAATGCA

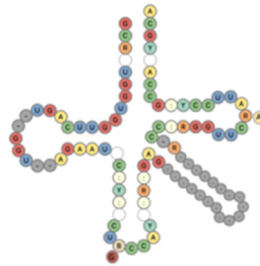

**Macaca\_mulatta\_Mmula8\_tRNA-Gly-GCC-11-1 Mammals (primates) (species)**

GCATGGGTGGTTCAGTGGTAGAATTCTTGCCCTGCCACGCGGGAGGCCCGGGTTCAA  
TTCCTGGCCCATACA

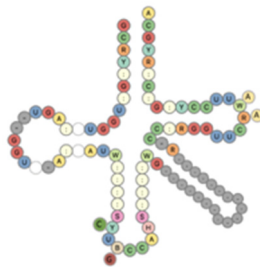

**Macropus\_eugenii\_Meuge2\_tRNA-Gly-GCC-9-1 Macropodinae (kangaroo)**

GGTaccgc**ATG**GATGGTTCAG**TGGT**AGAATCCTTCC**CTGCCA**CGCGGGAGGTCCAGG  
**TTCAA**TTCTGGCTCGACCA

**Medicago\_truncatula\_A17\_Mtrun4\_tRNA-Gly-GCC-2-1** Plant (tracheophytes)  
(species)

GCACCAG**TGGTCTAGTGGT**AGAATAGTACC**CTGCCA**TGGTACAGaCCCGGG**TTCAAT**  
TCCTGGCTGGTGCA

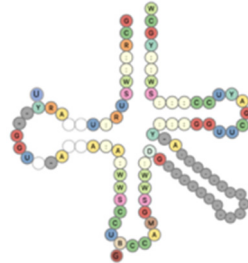

**Melopsittacus\_undulatus\_Mundu1\_tRNA-Gly-GCC-2-2** Aves (parakeet) (species)

GCATTGG**TGGTTCAGTGGT**AGAATTCTCGC**CTGCCA**CGCGGGAGGCCCGGG**TTCAA**  
TTCCCGGCCAATGCA

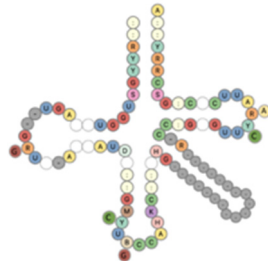

**Metallosphaera\_sedula\_CuR1\_Meta\_sedu\_CuR1\_tRNA-Gly-GCC-1-1**  
Thermoproteota (archaea) (species)

GCGGCCG**TAGTCTAGCCTGG**AttAGGACGC**CTGCC**TGCCACGCAGGAGGtCCCGGG**T**  
**TCAA**ATCCCGGCGGTCGCA

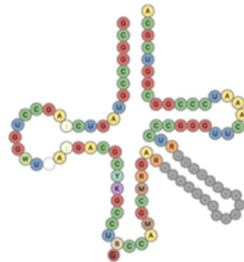

**Methanobacterium\_formicicum\_BRM9\_Meth\_form\_BRM9\_tRNA-Gly-GCC-1-1**  
Euryarchaeota (species)

GCGGCG**TAGTCCAGCCTGGT**TAAGACACTGGC**CTGCCA**CGCCAGCGACCCGGG**TT**  
**CAA**ATCCCGGACGCCGCA

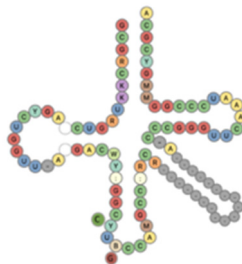

**Methanobrevibacter\_ruminantium\_M1\_Meth\_rumi\_M1\_tRNA-Gly-GCC-1-1**  
**Euryarchaeota (species)**

GCGGTGT**T**AGTCCAGCCT**TGGT**tAAGACTCTAGC**CTGCCA**CGTTAGAGACCCGGG**TTC**  
**AA**ATCCCGGACGCCGCA

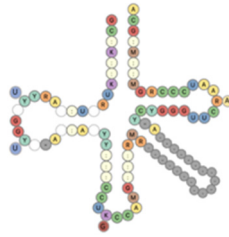

**Methanocaldococcus\_fervens\_AG86\_Meth\_ferv\_AG86\_tRNA-Gly-GCC-1-1**  
**Euryarchaeota (species)**

GCGGCCT**TGGT**GTAGCC**TGGTA**ACACACGGG**CTGCCA**CGCCCGGA**CCCCGGGTTT**  
**AA**ATCCCGGAGGCCGCACCA

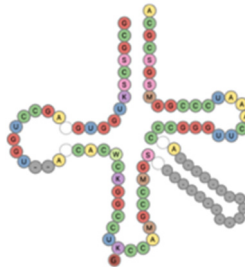

**Methanocella\_arvoryzae\_MRE50\_Meth\_arvo\_MRE50\_tRNA-Gly-GCC-1-1**  
**Methanocellales archaea (species)**

GCGCCGG**T**AGTGTAGTGGTtATCACTGTAGCT**TGCCA**AAGCTATAGACTCGGG**TTCAAT**  
**TCCCGACCGGC**GCACCA

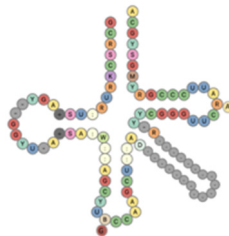

**Methanococcus\_maripaludis\_C5\_Meth\_mari\_C5\_tRNA-Gly-GCC-1-1**  
**Methanococcaceae archaea (species)**

GCGGCTT**TG**ATGTAG**ACTGGTA**TCATACGGCC**CTGCCA**CGGCCGACACCCGGG**TTC**  
**AA**ATCCCGGAGGCCGCA

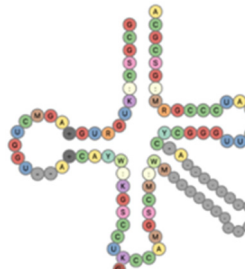

**Methanococcus\_voltae\_A3\_Meth\_volt\_A3\_tRNA-Gly-GCC-1-1**      **Methanococcaceae**  
**archaea (species)**

GCGGCCT**TG**ATGT**AGTGGTA**TCATACGGCC**CTGCCA**CGGCCGATACCCGGG**TTCAA**  
**ATCCCGGAGGCCGCA**

**Methanopyrus\_kandleri\_AV19\_Meth\_kand\_AV19\_tRNA-Gly-GCC-1-1 Euryarchaeota**

GCGGCCGCAGTCTAGTCT**TGGTA**GGACGCGGGC**CTGCC**GAGCCCGTGGCCCGGG**TTCAA**ATCCCGGCGGCCGCACCA

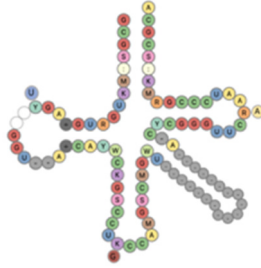

**Methanosarcina\_lacustris\_Z-7289\_Meth\_lacu\_Z\_7289\_tRNA-Gly-GCC-1-1**  
**Methanosarcinales archaea (species)**

ACATCAG**T**AGTGT**AGCGGT**cATCACCGGGCGT**TGCCA**ACGCTCGAaCTCGGG**TTCAA**ATCCCGACTGGTGTA

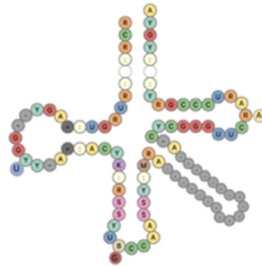

**Methanosphaera\_stadtmanae\_DSM\_3091\_Meth\_stad\_DSM\_3091\_tRNA-Gly-GCC-1-1**  
**Methanobacteriaceae archaea (species)**

GCAGCG**AT**AGTCCAGGCT**TGGC**iAAGACTCTACC**CTGCCA**CGGTAGTGACCCGGG**TTC**AAATCCCGGTCTGTTGCA

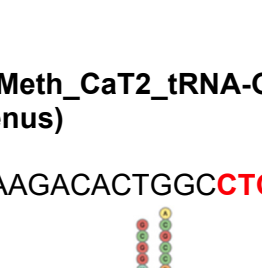

**Methanothermobacter\_sp\_CaT2\_Meth\_CaT2\_tRNA-Gly-GCC-1-1**  
**Methanobacteriaceae archaea (genus)**

GCGGCGT**T**AGTCCAGCC**TGGT**TAAGACACTGGC**CTGCCA**CGCCAGCGACCCGGG**TTCAA**ATCCCGGACGCCGCA

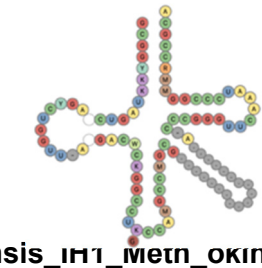

**Methanothermococcus\_okinawensis\_IH1\_Metn\_okin\_IH1\_tRNA-Gly-GCC-1-1**  
**Methanocaldococcaceae archaea (species)**

GCGGCCT**TG**ATGTAGCC**TGGTA**TCATACGGCC**CTGCCA**CGGCCGATACCCGGG**TTC**AAATCCCGGAGGCCGCA

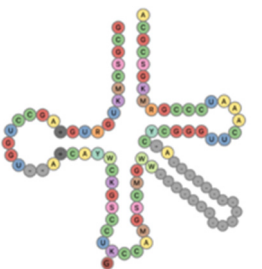

**Methanothermus\_fervidus\_DSM\_2088\_Meth\_ferv\_DSM\_2088\_tRNA-Gly-GCC-1-1**  
**Methanothermaceae archaea**

GCGGCGT**T**AGTCCAGCC**TGGT**tAAGACGCTGGC**CTGCCA**CGCCAGTGACCCGGG**TTCAA**ATCCCGGACGCCGCA

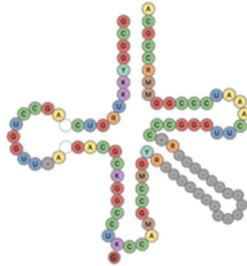

**Methanotorris\_igneus\_Kol\_5\_Meth\_igne\_Kol\_5\_tRNA-Gly-GCC-1-1**  
**Methanocaldococcaceae (archaea) (species)**

GCGGCCT**TG**ATGTAGCC**TGGTA**ACATACGGGC**CTGCCA**CGCCCGTTcCCCGGG**TTCAA**ATCCCGGAGGCCGCACCA

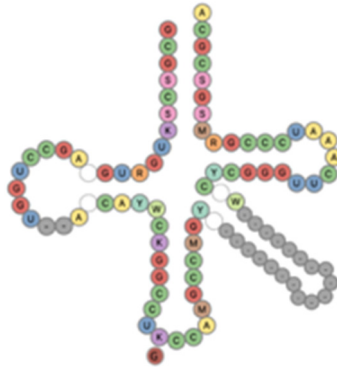

**Methylacidiphilum\_infernorum\_V4\_Meth\_infe\_V4\_tRNA-Gly-GCC-1-1**  
**Methylacidiphilales archaea**

GCGGGTG**T**AGCTCAGT**TGGTA**GAGCGCAACCT**TGCCA**AGGTTGACGtCGCGGG**TTCAA**AATCCCGTCACCCGCT

**Microcoleus\_sp\_PCC\_7113\_Micr\_PCC\_7113\_tRNA-Gly-GCC-2-1 Cyanobacteria**

GCGGGTG**TG**ATGT**AGTGG**CtAGCATCTGAGT**CTGCCA**GTCTCAGCgCATGGG**TTCAA**GTCCCATCATCCGCT

**Monodelphis\_domestica\_Mdome5.1\_tRNA-Gly-GCC-3-1**      **Mammals**      **(dolphin)**  
**(species)**

GCATTGG**TG**GTTC**AGTGGTA**GAATTCTCGC**CTGCCA**CGCGGGGGGCCTGGG**TTCAA**TTCCCGGCCAATGCA



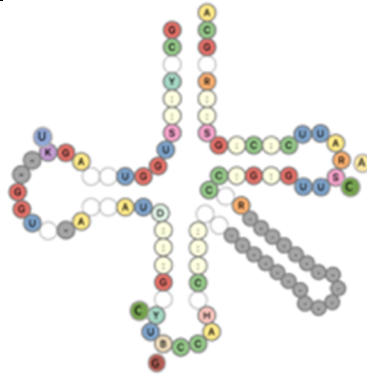

**Moorella\_thermoacetica\_ATCC\_39073\_Moor\_ther\_ATCC\_39073\_tRNA-Gly-GCC-1-1**  
**Bacillota (species)**

GCGGAAG**T**AGCTC**A****GTGGTA**GAGCATCGCCT**TGCCA**AGGCGAGGGcCGCGGG**TTCA**  
**A**ATCCCGTCTTCCGCTCCA

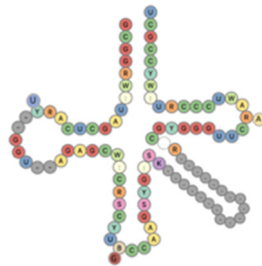

**Mrakia\_frigida\_Nwmf-AP1\_Mrak\_frig\_Nwmf\_AP1\_tRNA-Gly-GCC-1-1 Fungus**  
**(species)**

ATAGGTAT**T**GGTGA**A****GTGG**CiATCATTGCGCT**TGCCA**TGCGTGAGGCAGGGG**TTCAA**  
 TTCCCCTTACCTATA

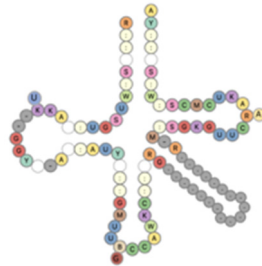

**Mus\_caroli\_CAROLIEiJ\_MusCAROLI\_EiJ\_1509\_tRNA-Gly-GCC-34-1** **Mammals**  
**(mouse)**

GCATAAG**T**GGTTC**A****GTGGTA**GAATTCTCAC**CTGCCA**TTTGGGAGGCCAGG**TTCAAT**  
 TCCAGGCCCATtGCA

**Mus\_musculus\_AJ\_MusA\_J\_1509\_tRNA-Gly-GCC-2-1 Mammals (mouse) (species)**

GCATGGG**T**GGTTC**A****GTGGTA**GAATTCTCAC**CTGCCA**TGAGGGAGGCCAGG**TTCAA**  
 TTCCAGGCCCATtGCA

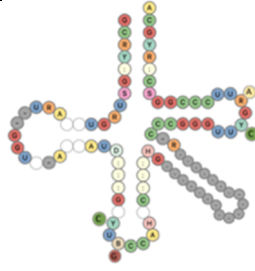

**Mus\_pahari\_PAHARIEiJ\_MusPAHARI\_EiJ\_1509\_tRNA-Gly-GCC-392-1**      **Mammals**  
**(mouse)**

GAGATGGCT**TCAGTGGT**taAGGATACTGA**CTGCCA**TTCCAGATGaCCTGGG**TTCAA**TTC  
 CTAGCAACTGCA

**Mus\_spretus\_SPRETEiJ\_MusSPRET\_EiJ\_1509\_tRNA-Gly-GCC-4-1**      **Mammals**  
**(mouse)**

GCATGGG**TGGTTCAGTGGT**AGAATTCTCAC**CTGCCA**TGAGGGAGGCCAGG**TTCAA**  
 TTCCAGGCCCATtGCA

**Mycoplasma\_agalactiae\_5632\_Myco\_agal\_5632\_tRNA-Gly-GCC-1-1**      **Tenericutes**  
**bacteria (species)**

GCAAATG**TAGTTC AATGGT**AGAACACCAGCT**TGCCA**TGCTGGATaCGGGGG**TTCAAT**  
 TCCCCTCATTGCTCCA

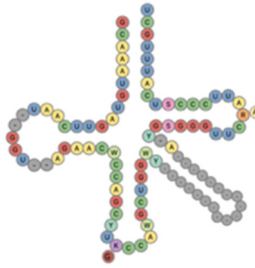

**Myxococcus\_stipitatus\_DSM\_14675\_Myxo\_stip\_DSM\_14675\_tRNA-Gly-GCC-1-1**  
**Deltaproteobacteria (species)**

GCGGGA**ATAGCTCAGCGGTA**GAGCATCGCCT**TGCCA**AGGCGAGGGtCGAGGG**TTCA**  
**AATCCCTTTTCCCGCTCCA**

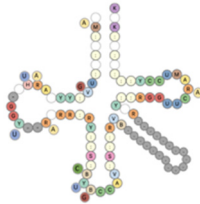

**Naegleria\_gruberi\_NEG-M\_Naeg\_grub\_NEG\_M\_tRNA-Gly-GCC-1-6**      **Eukaryota**  
**(amoeba)**

GCGTCG**ATGGTTT AGTGGT**AGAATACGGCGT**TGCCA**TCGCCGTGaCCCGGG**TTCAA**  
 TTCCCGGTGACGCA

**Natrialba\_magadii\_ATCC\_43099\_Natr\_maga\_ATCC\_43099\_tRNA-Gly-GCC-1-1**  
**Halobacteriaceae archaea (species)**

GCGCTGG**TAGTGT AGTGGT**ATCACGTGACCT**TGCCA**TGGTCACAaCCTGGG**TTCAA**A  
 TCCCAGCCAGCGCA

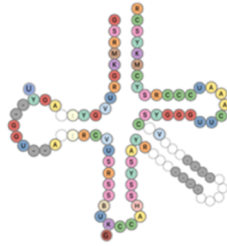

**Natrinema\_pellirubrum\_DSM\_15624\_Natr\_pell\_DSM\_15624\_tRNA-Gly-GCC-1-1**  
Halobacteriaceae archaea (species)

GCGCTGG**T**AGTGT**AGTGGTA**TCACGTGACCT**TGCCA**TGGTCACAaCCTGGG**TTCAA**A  
TCCCAGCCAGCGCA

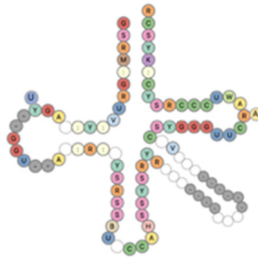

**Natronococcus\_occultus\_SP4\_Natr\_occu\_SP4\_tRNA-Gly-GCC-1-1** Halobacteriaceae  
archaea (species)

GCGCTGG**T**AGTGT**AGTGGTA**TCACGTGACCT**TGCCA**TGGTCACAaCCTGGG**TTCAA**A  
TCCCAGCCAGCGCA

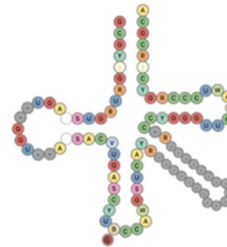

**Natronomonas\_moolapensis\_8811\_Natr\_mool\_8\_8\_11\_tRNA-Gly-GCC-1-1**  
Halobacteriaceae archaea (species)

GCGCTGG**T**AGTGT**AGTGGTA**TCACGTGACCT**TGCCA**TGGTCACAaCCGGGG**TTCAA**A  
TCCCCGCCAGCGCA

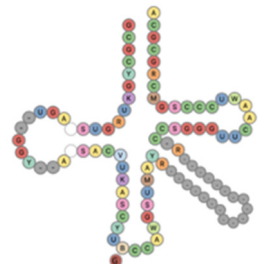

**Nicotiana\_tabacum\_K326\_Ntaba\_K326\_tRNA-Gly-GCC-4-1** Plant (solanacea)

GCGGAA**A**TAGCTT**AATGGTA**GAGCATAGCCT**TGCCA**AGTCTAAGAtTGAGGG**TTCAA**A  
**G**TCCCTCTTTCCGCT

**Nitrososphaera\_viennensis\_EN76\_Nitr\_vien\_EN76\_tRNA-Gly-GCC-1-1**  
Nitrosphaeraceae archaea (species)

GCGACGG**T**CGTCCAGTT**TGGT**ctAGGACATCAGATT**TGCCA**ATCTGGTAaCCCGGG**TTC**  
**AA**ATCCCGGCCGTCGCACCA

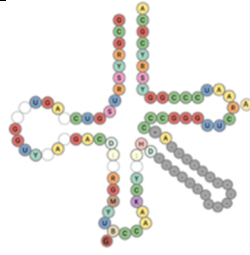

**Nonlabens\_dokdonensis\_DSW-6\_Nonl\_dokd\_DSW\_6\_tRNA-Gly-GCC-1-1**  
**Flavobacteria (species)**

GCGAAAGTAGCTCAGG**GGTA**GAGCATCACCT**TGCCA**AGGTGGAGGtCGCGAG**TTCA**  
**A**ATCTCGTCTTTCGCT

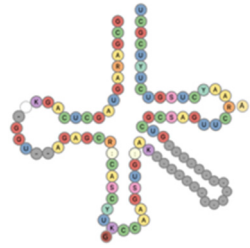

**Oreochromis\_niloticus\_Onilo2\_tRNA-Gly-GCC-11-1 Fish (species)**

CACTTC**AT**AGTAC**AACGGT**TCAGACATTTGCT**TGCCA**TGCAAAAGGtCACTGG**TTCAA**  
 TTTTAGCTGGAGattaaA

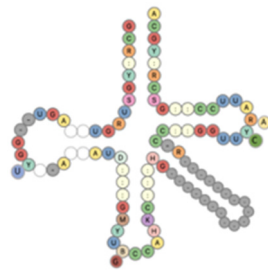

**Orientia\_tsutsugamushi\_str\_Boryong\_Orie\_tsut\_Boryong\_tRNA-Gly-GCC-1-1**  
**Rickettsiaceae bacteria (species)**

GCGGATGTAGCTCAG**TGGTA**GAGCGTTACTT**TGCCA**AGGTAAAAGtCGTGGG**TTCAA**  
 TTCCCATCATCCGCT

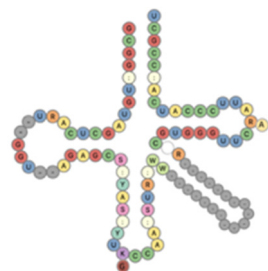

**Oryctolagus\_cuniculus\_Ocuni2\_tRNA-Gly-GCC-21-1 Mammals (rabbit) (species)**

GGAGCTGTGGCATAGTG**GGTA**AAGCCGCTG**CTGCCA**TGCCAGCATCCCATATGGg  
 CGCAGG**TTCAAG**TCCCGGCTGCTCCA

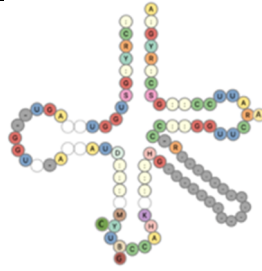

**Oryzias\_latipes\_Olati3\_tRNA-Gly-GCC-2-1 Fish (species)**

GCATTGG**T**GTAT**AGTGGTA**GCATAGCTGCT**TGCCA**TGCAGTTGaCCTGGG**TTCAA**T  
TCCCAGCCAATGCA

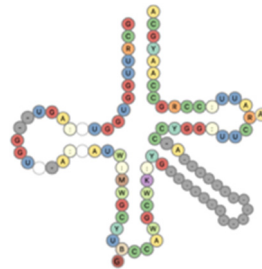

**Oscillatoria\_acuminata\_PCC\_6304\_Osci\_acum\_PCC\_6304\_tRNA-Gly-GCC-2-1 Cyanobacteria (species)**

GCGGGTG**T**GATGT**AGTGGTA**AAGCATCTGAGT**CTGCCA**GTCTCAGTGCATGGG**TTCAA**  
ATCCCATCATCCGCT

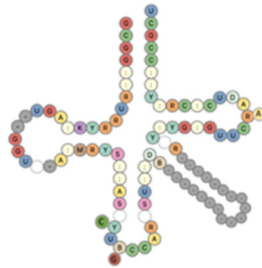

**Otolemur\_garnettii\_Ogarn3\_tRNA-Gly-GCC-5-1 Mammals (primates) (species)**

GCATGGG**T**GGTTC**AGTGGTA**GAATTCTCGC**CTGCCA**CGCGGGAGGCCCGGG**TTCAA**  
TTCCCGGCCCATGCA

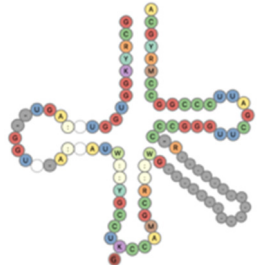

**Ovis\_aries\_Oarie4\_tRNA-Gly-GCC-1572-1 Mammals (sheep) (species)**

GCATGAG**T**GGTTC**AGTGGTA**GAATTCTCAC**CTGCCA**CGTGGGAAGCCCAGAT**TTCAAT**  
TCCCAGTCCATGCA

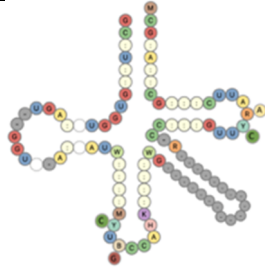

**Palaeococcus\_pacificus\_DY20341\_Pala\_paci\_DY20341\_tRNA-Gly-GCC-1-1**  
**Thermococcaceae archaea (species)**

GCGGTGG**T**AGTCTAGCC**TGG**CctAGGACTGCGGC**CTGCCA**CGCCGCAAgCCCGGG**TT**  
**CAA**ATCCCGGCCACCGCACCA

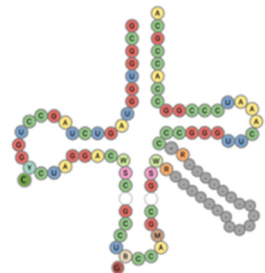

**Parachlamydia\_acanthamoebae\_UV-7\_Para\_acan\_UV\_7\_tRNA-Gly-GCC-2-1**  
**Chlamydiae bacteria (species)**

GCGGGTGG**T**AGCTC**AGTGGTA**GAGCATCACGT**TGCCA**ACGTGAGGGtCGTGAG**TTCAA**  
**GCCTCATCACCCGCT**

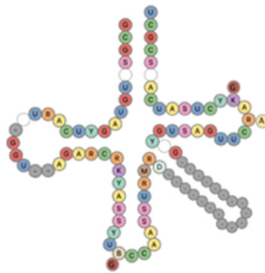

**Paracoccidioides\_brasiliensis\_Pb03\_Para\_bras\_Pb03\_tRNA-Gly-GCC-2-1**      **Fungus**  
**(species)**

GCATCAT**TGGTCTAGTGGTA**GAATTCATCGT**TGCCA**tcaccgctgt**TTCAA**acggcggttcggaT  
 TCGATGAGGCC

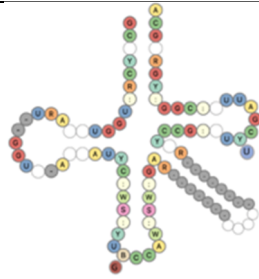

**Petromyzon\_marinus\_Pmari2\_tRNA-Gly-GCC-4-2 Agnatha (lamprey)**

GCATCGG**T**GGTTC**AGTGGTA**GAATTCTCGC**CTGCCA**CGCGGGAGGCCCGGG**TTCAA**  
 TTCCCGGCCGATGCA

**Pleurotus\_ostreatus\_PC15\_Pleu\_ostr\_PC15\_tRNA-Gly-GCC-3-2 Fungus (species)**

GCATCA**ATG**GGGT**AGTGGTA**ACCTGGGTCGT**TGCCA**ttgagtataTCGACCCGcCGCGAG  
**TTCAA**TTCTCGCTTGATGCA

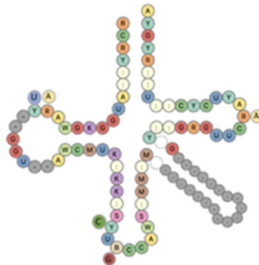

**Pleurozium\_schreberi\_Blido\_Pschr1\_tRNA-Gly-GCC-2-1 Plant (moss)**

GCACCAG**T**GTCT**AGTGGTA**GAATAGTACC**CTGCCA**CGGTACAGaCCCGGG**TTCAAT**  
 TCCCGGCTGGTGCA

**Plicaturopsis\_crispa\_FD-325\_SS-3\_Plic\_cris\_FD\_325\_SS\_3\_tRNA-Gly-GCC-2-1 Fungus (species)**

GCGTTA**ATG**GGGT**AGTGGTA**ACCTTGGTCGT**TGCCA**ttagcacaTTCGACCAGcCGGGG  
**TTCAA**TTCCCCCTTAATGCA

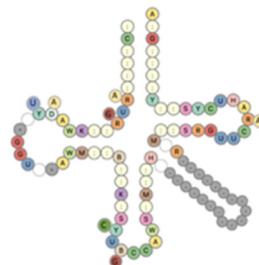

**Pohlia\_nutans\_NOL\_Pnuta1\_tRNA-Gly-GCC-16-1 Plant (moss)**

GAATTGGg**T**ttTgaGGTCT**AGTGGTA**GAATAGTATC**CTGCCA**CGGTACAGaCCCGGG**TT**  
**CAA**TTCCCGGCCGGTGCA

**Polaribacter\_sp\_MED152\_Pola\_MED152\_tRNA-Gly-GCC-1-1 Flavobacteria**

GCGAAAGTAGCTCAGG**GGT**AGAGCATCACCT**TGCCA**AGGTGAGGGtCGCGGG**TTCA**  
**AAT**CCCGTCTTTGCT

**Pristionchus\_pacificus\_Ppaci4\_tRNA-Gly-GCC-2-1 Nematodes (species)**

TCTCTTG**T**AGTAT**AGTGGT**tAGTATCCGCGC**CTGCCA**CGTGCGAGaCCCGGG**TTCAAT**  
TTCCGGCCAGAGAG

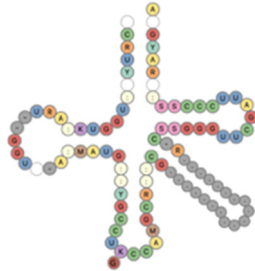

**Procavia\_capensis\_Pcape2\_tRNA-Gly-GCC-2068-1 Mammals (daman) (species)**

GGGGCC**T**cgtTGGCTT**AGTGGT**TAAGTACTTGATT**TGCCA**ACCAAGAGGtTGGTGG**TTCA**  
**A**ACCCAGCAGCTCCA

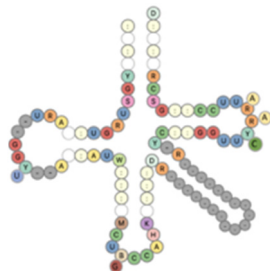

**Psychroflexus\_torquis\_ATCC\_700755\_Psyc\_torq\_ATCC\_700755\_tRNA-Gly-GCC-1-1 Flavobacteria (species)**

GCGAAAGTAGCTCAGC**GGT**AGAGCACACCT**TGCCA**AGGTGGGGGtCGCGGG**TTCA**  
**AAT**CCCGTCTTTGCT

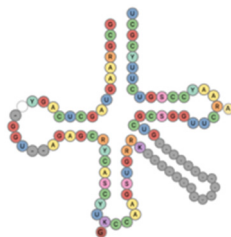

**Puccinia\_striiformis\_f\_sp\_tritici\_CY32\_Pucc\_stri\_f\_tritici\_CY32\_tRNA-Gly-GCC-8-1 Fungus**

GCaTCTGG**TG**TCAGT**TGG**GACAGCATCAGA**CTGCCA**acatgggctttcactcatgcATCTGAAG  
GtCCAGTG**TTCAAG**CCACTGTTGGGACA

**Pyrenochaeta\_lycopersici\_CRA-**

**PAV\_ER\_1211\_Pyre\_lyco\_CRA\_PAV\_ER\_1211\_tRNA-Gly-GCC-2-1 Fungus**

GGCACTT**T**GGCGG**AGTGGT**tAACGCGTATGT**CTGCCA**actaccacca**TTCAA**ctatcttgctaact  
cagtc



**Pyrobaculum\_aerophilum\_str\_IM2\_Pyro\_aero\_IM2\_tRNA-Gly-GCC-1-1**  
Thermoproteaceae archaea

GCGGCGGT**T**AGTCTAGCC**TGGT**ttAGGATGGCGGC**CTGCCA**AGCCGTTGAtCCCGGG**T**  
**TCAA**ATCCCGGCCGCCGCACCA

**Pyrococcus\_abyssi\_GE5\_Pyro\_abys\_GE5\_tRNA-Gly-GCC-1-1** Euryarchaeota  
archaea (species)

GCGGTGG**T**AGTCTAGCC**TGG**CctAGGACGCCACC**CTGCCA**AGGTGGAGACCCGG**T**  
**TCAA**ATCCCGGCCACCGCACCA

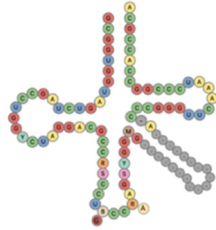

**Pyrolobus\_fumarii\_1A\_Pyro\_fuma\_1A\_tRNA-Gly-GCC-1-1** Crenarchaeota archaea  
(species)

GCGGCGGT**T**CGTCTAGCC**TGG**ActAGGACGCCGGC**CTGCCA**AGCCGGAGAtCCCGGG  
**TTCAA**ATCCCGGCCGCCGCACCA

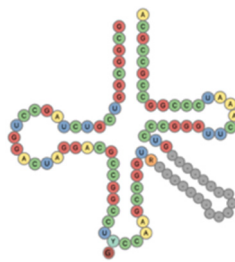

**Rattus\_norvegicus\_Rnorv6\_tRNA-Gly-GCC-1278-1** Mammals (rat) (species)

GaGAg**ATG**GCTC**AATGGT**taAGAGCACTGA**CTGCC**GtgctcTTCCAGAGGcCGTGAG**TTCA**  
**AAG**TCTCAGTAACCA

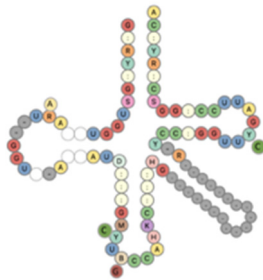

**Rhizobium\_gallicum\_bv\_gallicum\_R602\_Rhiz\_gall\_bv\_gallicum\_R602\_tRNA-Gly-GCC-1-1** Alphaproteobacteria (genus)

GCGGGT**T**AGCTC**AGG****GGTA**GAGCACAACCT**TGCCA**AGGTTGGGGtCGAGGG**TTCA**  
**AATCCCTTCGCCC**GCTCCA

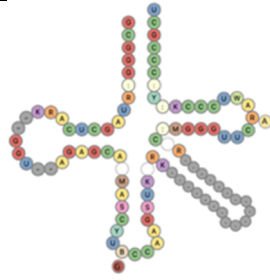

**Rhopilema\_esculentum\_Rescu1\_tRNA-Gly-GCC-8-1 Cnidaria (jellyfish)**

GCCACGGT**AGCCGAGTGGT**tAAGGTGCTCGA**CTGCCATGCCA**GCACTCTgGG**TTCAA**  
TCCTGGCTCGcaGACA

**Rhytidiadelphus\_loreus\_Rlore1\_tRNA-Gly-GCC-2-1 Bryophyta**

GCACCAG**TGGTCTAGTGGTA**GAATAGTACC**CTGCCA**CGGTACAGaCCCGGG**TTCAAT**  
TCCCGGCTGGTGCA

**Rickettsia\_massiliae\_MTU5\_Rick\_mass\_MTU5\_tRNA-Gly-GCC-1-1 Rickettsia  
bacteria**

GCGGGTG**TAGCTCAGGGGTA**GAGCGCTACCT**TGCCA**AGGTCTGAAGtCGAGGG**TTCA**  
**AATCCCTTCACCCGCTCCA**

**Rothia\_dentocariosa\_ATCC\_17931\_Roth\_dent\_ATCC\_17931\_tRNA-Gly-GCC-1-1  
Actinobacteria (species)**

GCGGTTG**TAGCTCAGTGGTA**GAGCACCACCT**TGCCA**AGGTGGATGtCGCGAG**TTCA**  
**AGTCTCGTCAACCGCT**

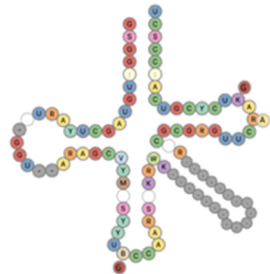

**Ruminiclostridium\_thermocellum\_ATCC\_27405\_Rumi\_ther\_ATCC\_27405\_tRNA-Gly-  
GCC-2-1 Bacillota**

GCGGGTT**AACTCAGTGGTA**GAGTGTACCT**TGCCA**AGGTGAAAGtCGCGAG**TTCAA**  
ATCTCGTAACCCGCTCCA

**Saccharolobus\_shibatae\_B12\_Sacc\_shib\_B12\_tRNA-Gly-GCC-1-1 Thermoproteota  
archaea**

GCGGCCG**TAGTCTAGCCTGGAtt**AGGACGCCTGC**CTGCCA**CGCAGGAGGtCCCGGG**T**  
**TCAAATCCCGGCGGCCGCA**

**Salinarchaeum\_sp\_Harcht-Bsk1\_Sali\_Harcht\_Bsk1\_tRNA-Gly-GCC-1-1  
Euryarchaeota**

GCGTCGG**TAGTGTAGTGGTA**TCACGTGACC**CTGCCA**CGGTTCGAaCCCGAG**TTCAA**  
ATCTCGGCCGACGCA

**Schizosaccharomyces\_octosporus\_yFS286\_Schi\_octo\_yFS286\_tRNA-Gly-GCC-2-1**  
Fungus (species)

GCTTTGG**TG**GTTT**AGTGGTA**TAATGCTTCGT**TGCCA**TCGAAGCGaCCCGGG**TTCAAT**  
TCCCGGCCGAAGCA

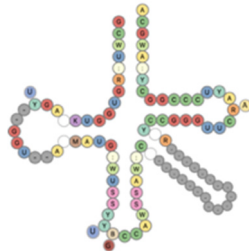

**Sclerotinia\_sclerotiorum\_1980\_UF-70\_Scle\_scle\_1980\_UF\_70\_tRNA-Gly-GCC-7-1**  
Fungus (species)

GCGTTTG**TG**GTTTA**ATGGTA**AAATCCATCGT**TGCCA**tcagggtctctgttctcatg**TTCAA**tagata  
atgaataatgTCG

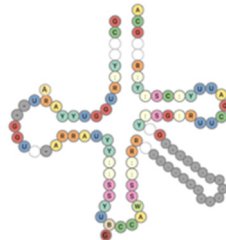

**Serratia\_marcescens\_SM39\_Serr\_marc\_SM39\_tRNA-Gly-GCC-3-1** Enterobacteria  
(species)

GCGGGA**AT**AGCTCAGT**TGGTA**AGAGCGCAACCT**TGCCA**AAGGTTGAGGtCGCGAG**TTCA**  
**AG**CCTCGTTTCCCGCTCCA

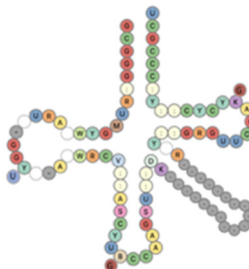

**Siansivirga\_zeaxanthinifaciens\_CC-SAMT-1\_Sian\_zeax\_CC\_SAMT\_1\_tRNA-Gly-GCC-1-1** Flavobacteria (species)

GCGAAAG**T**AGCTCAGG**GGTAG**AGCATCACCT**TGCCA**AAGGTGAGGGtCGCGGG**TTCA**  
**AAT**CCCGTCTTTTCGCT

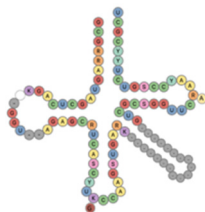

**Simkania\_negevensis\_Z\_Simk\_nege\_Z\_tRNA-Gly-GCC-1-1** Chlamydiota bacteria  
(species)

GCGGGTG**T**AGCTC**AGTGGTA**GAGCATCACGT**TGCCA**ACGTGAGGGtCGTGAG**TTCAA**  
ATCTCATCACCCGCT

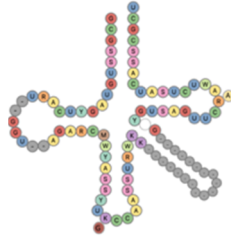

**Singulisphaera\_acidiphila\_DSM\_18658\_Sing\_acid\_DSM\_18658\_tRNA-Gly-GCC-1-1**  
**Planctomycetota bacteria (species)**

GCGGGAGTAGCTCAGG**GGTA**GAGCGCCACGT**TGCCA**ACGTGGTTGtCGTGGG**TTCAA**  
**AATCCCATCTCCCGCT**

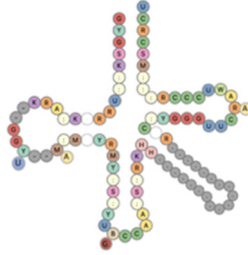

**Solanum\_lycopersicum\_Heinz\_1706\_Slyco3\_1\_tRNA-Gly-GCC-1-1 Plant (tomato)**

GCGGAA**AT**AGCTT**AATGGTA**GAGCATAGCCT**TGCCA**AGGCTAAGGtTGAGGG**TTCAA**  
**G**TCCCTCCTTCCGCT

**Sorangium\_cellulosum\_So0157-2\_Sora\_cell\_So0157\_2\_tRNA-Gly-GCC-1-2**  
**Myxococcales bacteria (species)**

GCGGGAGTAACTC**AGTGGTA**GAGTGCAACCT**TGCCA**AGGTTGACGtCGCGGG**TTCAA**  
 ATCCCGTCTCCCGCTCCA

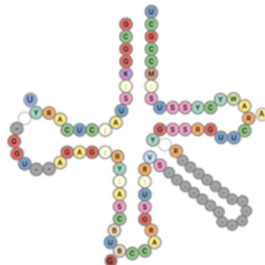

**Sorex\_araneus\_Saran2\_tRNA-Gly-GCC-29-1 Mammals (shrew) (species)**

GCTcG**ATTCA****AGTGGTA**GAATTCTCGG**CTGCCA**CGTGGGAGGCCCGGG**TTCAA**TTCC  
 CGGcccaTGCA

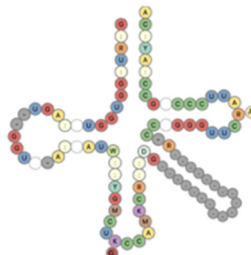

**Sperophilus\_tridecemlineatus\_Strid2\_tRNA-Gly-GCC-4615-1 Mammals (squirrel)**

GgGTtT**TAGCTCAGTGGTA**tAGAGCTTGCCcGCTTGCCTAGCatatGCGAGGcTGTAGG**TTCAA**TCCCTAgTACAACA

**Sphaerobolus\_stellatus\_SS14\_Spha\_stel\_SS14\_tRNA-Gly-GCC-1-1 (species)**

**Fungus**

GCACTAAT**TGGGTAGTGGTA**ACCTTGGTCGT**TGCCA**tcgagcacaTCGACCAGcCAGG**GGTTCAA**TTCCCCTTTAGTGCA

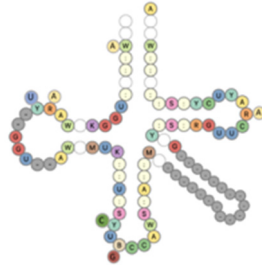

**Sphaerochaeta\_coccoides\_DSM\_17374\_Spha\_cocc\_DSM\_17374\_tRNA-Gly-GCC-1-1 Spirochaetota bacteria (species)**

GCGAGAG**TAGCTCAGTGGTA**GAGCTCCACCT**TGCCA**AGGTGGATGtCGCGGG**TTCAA**AATCCCGTCTCTCGCT

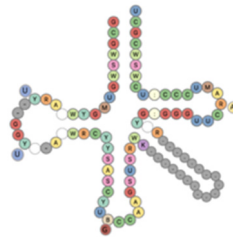

**Sphaerulina\_populicola\_P0202b\_p0202b\_Spha\_popu\_P02\_02b\_p02\_02b\_tRNA-Gly-GCC-1-1 Fungus (species)**

GCACTAG**TGGTTT****AGTGGTA**AAATTGCCGCT**TGCCA**tccaaattggatcct**TTCAA**accagggttc taaag

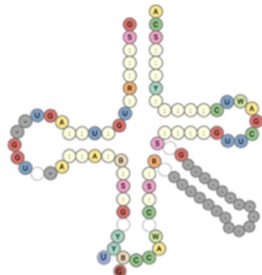

**Sphagnum\_fallax\_MN\_Sfall1\_tRNA-Gly-GCC-5-1 Bryophyta**

GCGGA**ATA**ACTT**AATGGTA**GAGTATAGCCT**TGCCA**AGGCTGAGGtTGAGGG**TTCAA**GTCCCTTTTTTCGCT

**Spirochaeta\_thermophila\_DSM\_6192\_Spir\_ther\_DSM\_6192\_tRNA-Gly-GCC-1-1 Spirochaetota bacteria (species)**

GCGGGAG**TAGCTCAGTGGTA**GAGCTCCACCT**TGCCA**AGGTGGATGtCGCGGG**TTCAAAG**TCCCGTCTCCCGCT

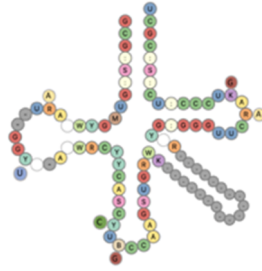

**Spirogloea\_muscicola\_CCAC\_0214\_Smusc1\_tRNA-Gly-GCC-15-1 Algae**

GTGGAAGTAGGTTACTGGTAGAGTATAGCATTGCCAAGGCTGAGGtTGAGGGTTCAA  
GTCCTTGTTCCGCT

**Spodoptera\_frugiperda\_Sfrug1\_tRNA-Gly-GCC-4-1 Lepidoptera**

TGCACaGTGGGCCAGTGGCTGGGCAACTGACTGCCGTGCAACGTGtCGCGGGTTCA  
ATTCTCGCACGCACAA

**Stereum\_hirsutum\_FP-91666\_SS1\_Ster\_hirs\_FP\_91666\_SS1\_tRNA-Gly-GCC-2-3 Fungus (species)**

GCATCAATGGGGTAGTGGTAACCTGGGTCGTGCCAtcatgtTTCGAaagcataattgtgcata  
TCGACCCGcCGGGGGTTCAATTCCCCCTTGATGCA

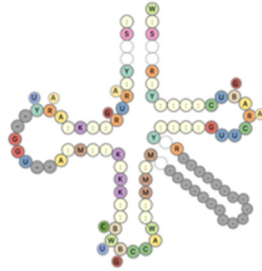

**Stigmatella\_aurantiaca\_DW43-1\_Stig\_aura\_DW4\_3\_1\_tRNA-Gly-GCC-1-1 Myxococcales bacteria (species)**

GCGGGAATAGCTCAGCGGTAGAGCATCGCCTTGCCAAGGCGAGGGtCGAGGGTTCA  
AATCCCTTTTCCCGCTCCA

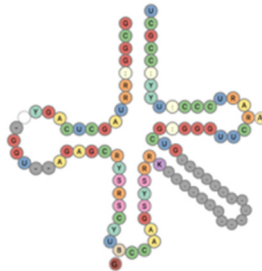

**Strongylocentrotus\_purpuratus\_Spurp5\_tRNA-Gly-GCC-4-1 Echinodermata (urchin)**

GCATCGGTGGTTCAGTGGTAGAATTCTCGCTGCCACGCGGGGGaCCCGGGTTCAA  
TTCCCGGCCGATGCA

**Sulfobacillus\_acidophilus\_DSM\_10332\_Sulf\_acid\_DSM\_10332\_tRNA-Gly-GCC-1-1 Bacillota**

GCGGAAGTAGCTCAGTGGTAGAGCATCGCCTTGCCAAGGCGAGGGtCGCGGGTTCA  
AATCCCGTCTTCCGCTCCA

**Sulfolobus\_islandicus\_HVE104\_Sulf\_isla\_HVE10\_4\_tRNA-Gly-GCC-1-1**  
**Proteoarchaeota (species)**

GCGGCCG**T**AGTCTAGCC**TGG**AttAGGACGC**CTGCCTGCCA**CGCAGGAGGtCCCGGG**T**  
**TCAA**ATCCCGGCGGCCGCA

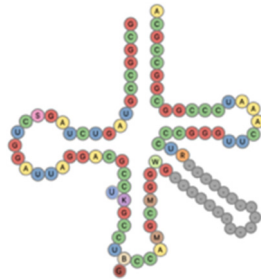

**Sus\_scrofa\_Sscro11\_tRNA-Gly-GCC-5-1 Mammals (pig) (species)**

GCATGGG**T**GGTTCAGG**GGT**AGAATTCTCAC**CTGCCA**CGTGGGAGGCCCGGG**TTCAA**  
 TTCCCGGCCTGTGCG

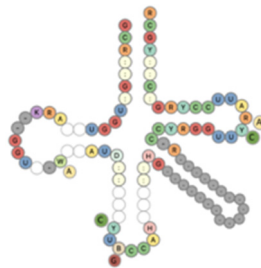

**Syntrophobacter\_fumaroxidans\_MPOB\_Synt\_fuma\_MPOB\_tRNA-Gly-GCC-1-1**  
**Thermodesulfobacteriota bacteria (species)**

GCGGGA**AT**AACTC**AGC****GGTA**GAGTGCAACCT**TGCCA**AAGTTGAAGtCGCGGG**TTCAA**  
 ATCCCGTTTCCCGCTCCA

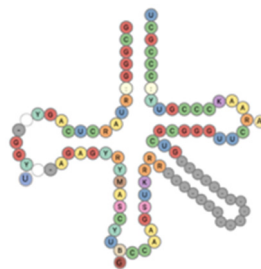

**Taeniopygia\_guttata\_Tgutt2\_tRNA-Gly-GCC-10-1 Aves (species)**

GCCCTGG**T**GGCTCCG**TGGTA**GAATTCTGC**CTGCCA**CGGCGGCAGCCTGGG**TTCAAT**  
 TCCCGGCAGAGGCA

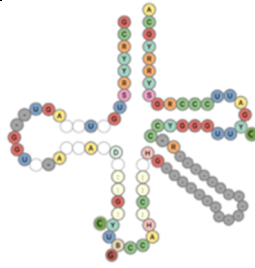

**Tarsius\_syrichta\_Tsyri2\_tRNA-Gly-GCC-15-1 mammals (tarsier)**

ACATGGG**T**AGTTCAG**TGGTA**GAATTCTCGC**CTGCCA**CACAGGAGGCCCGGAT**TTCAAT**  
TACTAACCCATGCAT

**Tepidanaerobacter\_acetatoxydans\_Re1\_Tepi\_acet\_Re1\_tRNA-Gly-GCC-1-1 Bacillota (species)**

GCGGAAG**TGG**CTCAG**TGGTA**GAGCATCGCCT**TGCCA**AGGCGAGGGtCGCGGG**TTCA**  
**A**ATCCCGTCTTCCGCTCCA

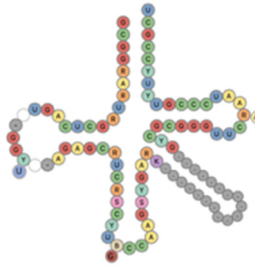

**Terribacillus\_aidingensis\_MP602\_Terr\_aidi\_MP602\_tRNA-Gly-GCC-1-1 Bacillota (species)**

GCGGAAG**T**AGTTC**AGTGGTA**GAACACCACCT**TGCCA**AGGTGGGGGtCGCGAG**TTCA**  
**A**ATCTCGTCTTCCGCTCCA

**Terriglobus\_roseus\_DSM\_18391\_Terr\_rose\_DSM\_18391\_tRNA-Gly-GCC-1-1 Acidobacteriota bacteria (species)**

GCGGGAG**T**AGCTC**AGTGGTA**GAGTGCTTCCT**TGCCA**AGGAAGATGtCGCGGG**TTCAA**  
ATCCCGTCTCCCGCTCCA

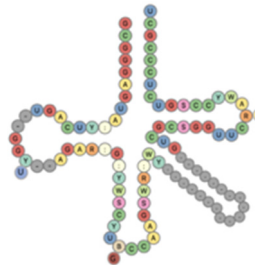

**Thaumarchaeota\_archaeon\_SAT1\_Thau\_arch\_SAT1\_tRNA-Gly-GCC-1-1 Thaumarchaeota archaea**

GCGGCTG**T**AGTATAGCC**TGGC**cAGTACGCGGGAT**TGCCA**ATTCTGTGACCCGGG**TTC**  
**AA**ATCCCGGCAGCCGCA



**Thermacetogenium\_phaeum\_DSM\_12270\_Ther\_phae\_DSM\_12270\_tRNA-Gly-GCC-1-1 Acidobacteriota bacteria (species)**

GCGGAAGTAGCTCAGCGGTAGAGCATCGCCTTGCCAAGGCGAGGGcCGCGGGTTCA  
AATCCCGTCTTCCGCTCCA

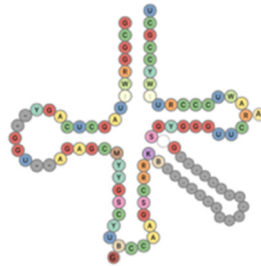

**Thermanaerovibrio\_acidaminovorans\_DSM\_6589\_Ther\_acid\_DSM\_6589\_tRNA-Gly-GCC-1-1 Synergistota bacteria**

GCGGAAGTAGCTCAGGGGTAGAGCACAACCTTGCCAAGGTTGGGGtCGCGGGTTCA  
AATCCCGTCTTCCGCTCCA

**Thermococcus\_barophilus\_MP\_Ther\_baro\_MP\_tRNA-Gly-GCC-1-1 Euryarchaeota (species)**

GCGGTGGTAGTCTAGCCTTGGCctAGGACAGCGGCCTGCCACGCCGCGGGCCCGGGT  
TCAAATCCCGGCCACCGCACCA

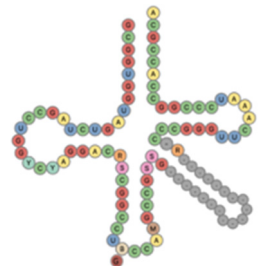

**Thermodesulfatator\_indicus\_DSM\_15286\_Ther\_indi\_DSM\_15286\_tRNA-Gly-GCC-1-1 Thermodesulfobacteriaceae bacteria (species)**

GCGGGAGTAGCTCAGTTGGTAGAGCGCCACCTTGCCAAGGTGGATGtCGCGGGTTC  
AAGTCCCGTCTCCCGCTCCA

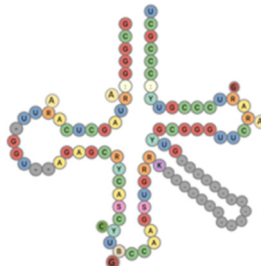

**Thermodesulfobivibrio\_yellowstonii\_DSM\_11347\_Ther\_yell\_DSM\_11347\_tRNA-Gly-GCC-1-1 Methanococcaceae archaea**

GCGGGTGTAGCTCAGCTTGGTAGAGCACAACCTTGCCAAGGTTGGGGtCGCGGGTTC  
AAATCCCGTCGCCCCGCT

**Thermofilum\_carboxyditrophus\_1505\_Ther\_carb\_1505\_tRNA-Gly-GCC-1-1**  
**Thermofilaceae archaea**

GCGGCCGTAGTCTAGTCT**TGGTA**GGATGGCGGC**CTGCCA**CGCCGCAGAAaCCCGGGT**TCAA**ATCCCGGCGGCCGCACCA

**Thermogladius\_cellulolyticus\_1633\_Ther\_cell\_1633\_tRNA-Gly-GCC-1-1**  
**Crenarchaeota**

GCGGCCGT**TCGTCTAGCC****TGG**ActAGGACGCCGGC**CTGCCA**CGCCGGAAAtCCCGGGT**TCAA**ATCCCGGCGGCCGCA

**Thermoplasma\_volcanium\_GSS1\_Ther\_volc\_GSS1\_tRNA-Gly-GCC-1-1**  
**Thermoplasmataceae archaea (species)**

GCGGGTG**TGGTGTAGCC****TGG**CAACACGCGAGCT**TGCCA**AGCTCGTGcCTCGGG**TTC**  
**AA**ATCCCGACATCCGCA

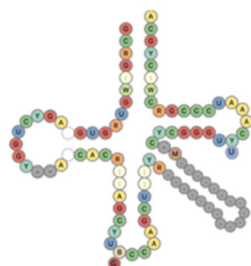

**Thermoproteus\_neutrophilus\_V24Sta\_Pyro\_neut\_V24Sta\_tRNA-Gly-GCC-1-1**  
**Thermoproteaceae archaea**

GCGGCCGTAGTCTAGCC**TGGT**TTGGACGACGGGCGGTCCCGTCGCCCCGGAGTAG  
GATGGCGGC**CTGCCA**AGCCGTTGATCCCGGG**TTC**AAATCCCGGCCGCCGCACCA

**Thermosediminibacter\_oceani\_DSM\_16646\_Ther\_ocea\_DSM\_16646\_tRNA-Gly-GCC-1-1**  
**Bacillota (species)**

GCGGAAG**TGGCTCAGG****GGTA**GAGCATCGCCT**TGCCA**AGGCGAGGGtCGCGGG**TTCA**  
**A**ATCCCGTCTTCCGCTCCA

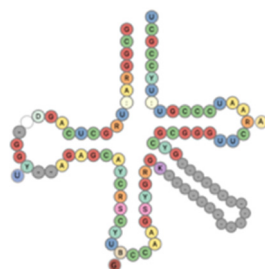

**Thermosipho\_africanus\_TCF52B\_Ther\_afri\_TCF52B\_tRNA-Gly-GCC-1-1**  
**Thermotoga bacteria**

GCGGGTG**TAGCTCA****GTGGTA**GAGCGCCTGCT**TGCCA**AGCAGGAGGtCGCGGG**TTCA**  
**A**ATCCCGTCGCCCCGCTCCA

**Thermosphaera\_aggregans\_DSM\_11486\_Ther\_aggr\_DSM\_11486\_tRNA-Gly-GCC-1-1**  
**Proteoarchaeota archaea**

GCGGCCGT**TCGTCTAGCC****TGG**ActAGGACGCCGGC**CTGCCA**CGCCGGAAAtCCCGGGT**TCAA**ATCCCGGCGGCCGCA

**Thermovibrio\_ammonificans\_HB-1\_Ther\_ammo\_HB\_1\_tRNA-Gly-GCC-1-1**  
**Desulfurobacteriaceae bacteria (species)**

GCGGGCG**T**AGCTCAGT**TGGTA**GAGCGCAACCT**TGCCA**AGGTTGAGGtCGCGGG**TTC**  
**AAG**TCCCGTCGCCCCGCTCCA

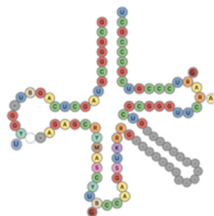

**Thermus\_oshimai\_JL-2\_Ther\_oshi\_JL\_2\_tRNA-Gly-GCC-1-2 Deinococcota bacteria**  
**(species)**

GCGGGAG**T**AGCTCAGT**TGGTA**GAGCACGACCT**TGCCA**AGGTCGGGGtCGCGGG**TTC**  
**AAG**TCCCGTCTCCCGCTCCA

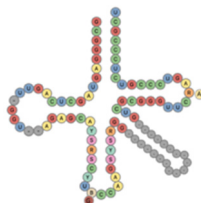

**Thermus\_scotoductus\_SA-01\_Ther\_scot\_SA\_01\_tRNA-Gly-GCC-1-2 Deinococcota**  
**bacteria (species)**

GCGGGAG**T**AGCTCAGT**TGGTA**GAGCACGACCT**TGCCA**AGGTCGGGGtCGCGGG**TTC**  
**AAG**TCCCGTCTCCCGCTCCA

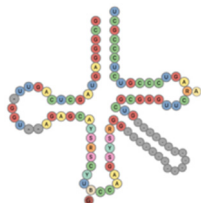

**Thuidium\_tamariscinum\_Ttama2\_tRNA-Gly-GCC-2-1 Bryophyta**

GCGGAA**AT**AGCTT**AATGGTA**GAGTATAGCCT**TGCCA**AGGCTGAGGtTGAGGG**TTCAA**  
**G**TCCCTTTTCCGCT

**Treponema\_denticola\_ATCC\_35405\_Trep\_dent\_ATCC\_35405\_tRNA-Gly-GCC-1-1**  
**Spirochaetota (species)**

GCGGGA**AT**AGCTC**AGTGGTA**GAGCGCCACCT**TGCCA**AGGTGGATGtCGCGAG**TTCA**  
**A**TCCTCGTTTCCGCT

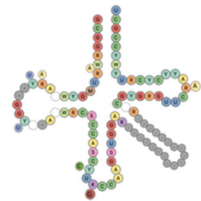

**Trichechus\_manatus\_latirostris\_Tmana1\_tRNA-Gly-GCC-13456-1**  
**(manatee) (species)**

**Mammals**

ACCCTGG**TGG**CTC**AGTGGT**tAAAGCGCTTGG**CTGCCA**ACCAAAAGGtCATTGG**TTCAA**  
 ACCCATTagctgctCTGTGGGA

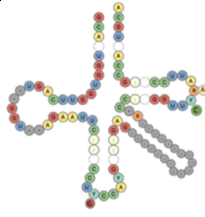

**Triticum\_aestivum\_Taest1\_tRNA-Gly-GCC-62-1 Plant (wheat)**

GCACCAG**T**GGTCTAG**TGGTA**GAATAGTACC**CTGCCA**TGGTACAGaCCTGGG**TTCAAT**  
TCCTGGCTGGTGGA

**Turneriella\_parva\_DSM\_21527\_Turn\_parv\_DSM\_21527\_tRNA-Gly-GCC-1-1  
Spirochaetota bacteria (species)**

GCGGGA**AT**AGCTC**AGTGGTA**GAGCACCTCCT**TGCCA**AGGAGGGGGtCGTGGG**TTCA**  
**AG**TCCCATTTCCTCGCT

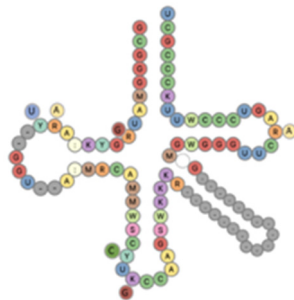

**Tursiops\_truncatus\_Ttrun2\_tRNA-Gly-GCC-166-1 Mammals (dolphin) (species)**

GCATTGG**T**GATTC**AGTGGTA**GAATTCTTG**CTGCCA**CGTGGGAGGCCAGGG**TTCAAT**  
TCCCAGCCAATGCA

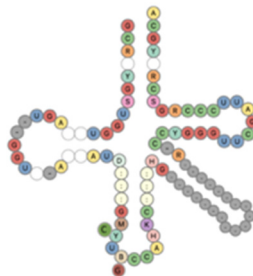

**Ustilago\_maydis\_521\_Usti\_mayd\_521\_tRNA-Gly-GCC-2-1 Fungus (species)**

GCATTGG**T**AGTGT**AGTGGTA**TCACGGGACGT**TGCCA**gcccgcctta**TTCAAG**gcttaaccacga  
atTCGTC

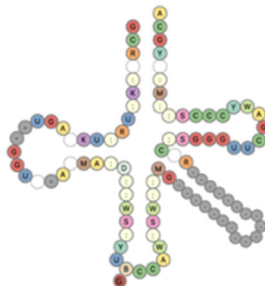

**Vicugna\_pacos\_Vpaco2\_tRNA-Gly-GCC-4-1 mammals (alpaca) (species)**

GGAGGg**T**ATAGCTC**AGTGGTA**GAGTGCATGC**CTGCCA**TGCACAAGGtCCTGGG**TTCA**  
**AT**CCCCAGTACCTCCA

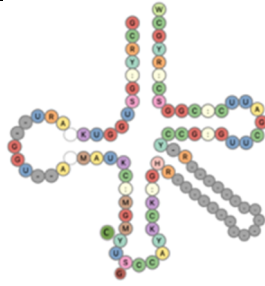

**Vitis\_vinifera\_Vvini\_tRNA-Gly-GCC-2-1 Plant (grape) (species)**

GCGGAA**AT**AGCTT**AATGGTA**GAGCATAGCCT**TGCCA**AGGCTGAGGtTGAGGG**TTCAA**  
**G**TCCCTCCTTCCGCT

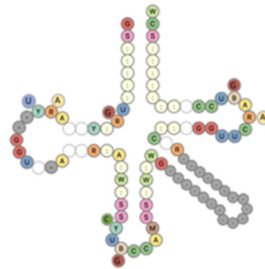

**Volvariella\_volvacea\_V23\_Volv\_volv\_V23\_tRNA-Gly-GCC-1-2 Fungus (species)**

GCATT**ATG**GGGTAG**TGGTA**ACCTGGGTCGT**TGCCA**ATTCGAttcc**TTCAAG**cTCGACCC  
 GcCGG

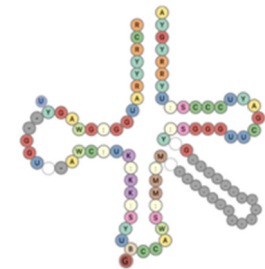

**Waddlia\_chondrophila\_WSU\_86-1044\_Wadd\_chon\_WSU\_86\_1044\_tRNA-Gly-GCC-1-1 Waddliaceae bacteria (species)**

GCGGGTGT**TA**GCTC**AGC****GGTA**GAGCATCACGT**TGCCA**ACGTGAGGGtCGTGAG**TTCA**  
**A**ATCTCATCACCCGCT

**Xenopus\_tropicalis\_Xtrop9\_tRNA-Gly-GCC-4-1 Frog (species)**

GCATTGGT**TG**GTTC**AGTGGTA**GAATTCTCGC**CTGCCA**CGCGGGAGGCCCGGG**TTCAA**  
 TTCCCGGCCAATGCA

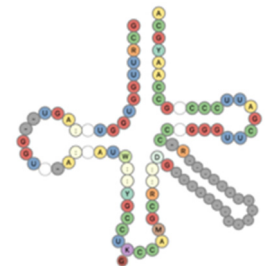

**Candidate\_division\_SR1\_bacterium\_RAAC1\_SR1\_tRNA-Gly-GCC-1-1 Bacteria**

GCAGGC**AT**AGCTCA**ATTGG**CtAGAGCGCTTCCT**TGCCA**AGGAAGAGGtGCGGG**TTC**  
**AA**ATCCCGTTGCTTGCTCCA

**Uncultured\_Termite\_group\_1\_bacterium\_phylotype\_Rs-D17\_tRNA-Gly-GCC-1-1**  
**Cellulolytic bacteria (species)**

GCGGGTGTAGTTCA**GTGGT**AGAACGTCTCGT**TGCCA**ACGAGAAGGtCGTGGG**TTCAA**  
**G**TCCCATCGCCCGCT

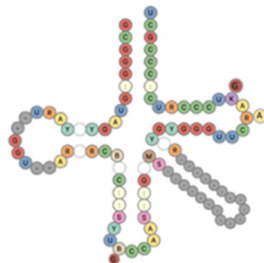

Above list of 246 species is extracted from GtRNAdB (<http://lowelab.ucsc.edu/GtRNAdB/>), which contains 18,047 tRNA-Gly<sup>gcc</sup> from 4,857 species: Eukaryota 599 12.3%, Archaea 220 (4.5%) and Bacteria 4,038 (83.1%). The 241 species are the only from the 4,857 species which have both the pentamers TGCCA in the anticodon loop and TTCAA in the Tψ-loop of their tRNA-Gly<sup>gcc</sup> cloverleaf structure. The high proportion of Archaea (54/246 = 22%) is due here to the primitive character of the AL-decamer *TGCCATTCAA*. The remaining part of AL, *GATGAATGGTAC*, occurs in articulation and D-loop of the cloverleaf.

**Table S3.** List of nucleolin AL-proximity for 22 species.

| 22 Species with Nucleolin mRNA                                                                                | AL-pentamer proximity |
|---------------------------------------------------------------------------------------------------------------|-----------------------|
| <i>Solanum lycopersicum</i> nucleolin (NCL) LOC101260453, mRNA NCBI Sequence: XM_010326160.3                  | 18.1σ                 |
| <i>Hydrotaea sandarakina</i> nucleolin (NCL) str. DSM 23241 LX80DRAFT, GenBank: QKZV01000007.1                | 16.8σ                 |
| <i>Gallus gallus</i> nucleolin (NCL), transcript variant X1, mRNA NCBI Sequence: XM_046898333.1               | 13.2σ                 |
| <i>Bauhinia variegata</i> nucleolin (NCL) isolate BV-YZ2020 chromosome 1, GenBank: JAKRY1020000001.1          | 13σ                   |
| <i>Homo sapiens</i> nucleolin (NCL), mRNA NCBI Sequence: NM_005381.3                                          | 11.8σ                 |
| <i>Lactobacillus lindneri</i> nucleolin (NCL) DSM 20690 = JCM 11027, GenBank: FUXS01000002.1                  | 11.7σ                 |
| <i>Hydrobacter penzbergensis</i> nucleolin (NCL) strain DSM 25353, GenBank: FNNO01000007.1                    | 11.5σ                 |
| <i>Ornithorhynchus anatinus</i> nucleolin (NCL), mRNA NCBI Sequence: XM_029064618.2                           | 11σ                   |
| <i>Acanthochromis polyacanthus</i> nucleolin (NCL) LOC110950732, mRNA NCBI Sequence: XM_022193488.2           | 10.8σ                 |
| <i>Bactrocera dorsalis</i> nucleolin (NCL) Fly_Bdor chr. 5 ASM2337382v1, mRNA NCBI Sequence: NC_064307.1      | 10.7σ                 |
| <i>Monodelphis domestica</i> nucleolin (NCL), variant X2, mRNA NCBI Sequence: XM_056819948.1                  | 9.4σ                  |
| <i>Xyrauchen texanus</i> nucleolin (NCL) LOC127639553, mRNA NCBI Sequence: XM_052121621.1                     | 9.3σ                  |
| <i>Cannabis sativa</i> nucleolin (NCL) chromosome 1, cs10, mRNA NCBI Sequence: NC_044371.1                    | 9.3σ                  |
| <i>Xenopus laevis</i> nucleolin L homeolog (NCLL), mRNA NCBI Sequence: NM_001372137.1                         | 8.8σ                  |
| <i>Arabidopsis thaliana</i> nucleolin like 2 (NUC-L2), mRNA NCBI Sequence: NM0_01338347.1                     | 7.5σ                  |
| <i>Dicentrarchus labrax</i> nucleolin (NCL) LOC127349869, mRNA NCBI Sequence: XM_051375928.1                  | 6.9σ                  |
| <i>Helianthus annuus</i> nucleolin (NCL) cultivar HA300 chromosome 17, GenBank: JANJOV010001181.1             | 6.9σ                  |
| <i>Exophiala</i> nucleolin (NCL) sp. JF 03-4F unplaced genomic scaffold EDD36 scaffold_3, GenBank: MU404352.1 | 6.8σ                  |
| <i>Raphanus sativus</i> nucleolin-like (NCL) cultivar WK10039 chromosome 4, GenBank: JRUI03000004.1           | 6.5σ                  |
| <i>Cyprinus carpio</i> nucleolin-like (NCL) LOC109082092, mRNA NCBI Sequence: XM_042712222.1                  | 6.25σ                 |
| <i>Carex littledalei</i> nucleolin (NCL) isolate C.B.Clarke chromosome 3, GenBank: SWLB01000003.1             | 5.6σ                  |
| <i>Saccharomyces cerevisiae</i> nucleolin (NCL) S288C chr. VII, mRNA NCBI Sequence: NC_001139.9               | 4.6σ                  |

| Table S4. Clusters obtained by Maxwell® from Archaea genomes [34] | Distance to Cluster barycenter | AL-proximity |
|-------------------------------------------------------------------|--------------------------------|--------------|
| Palaeococcus pacificus DY20341                                    | 0                              | 63.58        |
| Thermoplasmales archaeon SM1-50                                   | 1000130                        | 25.7         |
| Thaumarchaeota archaeon JGI OTU-3                                 | 1000407                        | 2.19         |
| Candidate divison MSBL1 archaeon SCGC-AAA259J03                   | 1000185                        | 10.7         |
| Thermoproteus tenax Kra1                                          | 1019727                        | -8.5         |
| Methanothermus fervidus DSM2088                                   | 1012772                        | 91.34        |
| Ignicoccus hospitalis KIN4 I                                      | 1015594                        | 6.54         |
| Ferroglobus placidus DSM 10642(2)                                 | 1006762                        | 35,3         |
| Candidatus Korarchaeum cryptofilum OPF8                           | 1014796                        | 64.98        |
| Thermococcus kodakarensisKOD1                                     | 1003734                        | 34.52        |
| Pyrococcus furiosus DSM3638                                       | 996602                         | 78.2         |
| Methanopyrus kandleri AV19                                        | 999896                         | -3.1         |
| Halorubrum lacusprofundi ATCC 49239                               | 0                              | -82          |
| Natrinema pellirubrum DSM 15624                                   | 997811                         | -95,5        |
| Halomicrobium mukohataei DSM 12286                                | 996207                         | -91,5        |
| Methanofollis liminatans DSM 4140                                 | 0                              | -17,7        |
| Methanoculleus bourgensis MS2                                     | 999743                         | -16,6        |
| Aciduli profundum boonei T469                                     | 0                              | 85,5         |
| Aciduli profundum SP Mar 08-339                                   | 997107                         | 72,3         |
| Archaeoglobus veneficus SNP6(2)                                   | 0                              | 28,5         |
| Archaeoglobus fulgidus                                            | 999098                         | 35,2         |
| Sulfolobus acidocaldarius                                         | 0                              | 59,8         |
| Sulfolobus tokodaii str.                                          | 999336                         | 99.52        |
| Methanocaldococcus jannaschii                                     | 0                              | 9,16         |
| Methanocaldococcus jannaschii DSM2661                             | 127503                         | 9.87         |
| Hadesarchaea archaeon DG-33                                       | 0                              | 10.49        |
| Hadesarchaea archaeon YNPN2                                       | 999702                         | 8.82         |
| Candidate divison MSBL1 archaeon SCGC-AAA259A05                   | 0                              | 2.56         |
| Candidate divison MSBL1 archaeon SCGC-AAA259E19                   | 997758                         | 4.85         |
| Dehydroabietic acid-degrading bacterium                           | 0                              | -0,4         |
| Leptothrix sp                                                     | 403141                         | -2.24        |
| Candidatus Nitrosopelagicus brevis                                | 0                              | 136,8        |
| Candidatus Nitrosopumilus koreensis AR1                           | 991517                         | 149,6        |
| Candidatus Bathyarchaeta archaeon B25                             | 0                              | 2,35         |
| Candidatus Bathyarchaeta archaon B26                              | 975089                         | 1,034        |
| Altiarchaeales archaeon SM1                                       | 0                              | 28.64        |
| Candidatus altiarchaeales                                         | 293                            | 35.09        |
| Candidatus Methanoplasma termitum                                 | 0                              | 40,2         |
| Vulcanisaeta moutnovskia 768-28                                   | 0                              | 43.58        |

|                                                  |   |        |
|--------------------------------------------------|---|--------|
| Thiobacillus denitrificans copie                 | 0 | -6,8   |
| Thorarchaeota archaeon SMTZ1-83                  | 0 | 17.48  |
| Thermoplasma volcanium GSS1                      | 0 | 71,28  |
| Thorarchaeota archaeon SMTZ-45                   | 0 | 32.34  |
| Thermoplasmatales archaeon DG-70-1               | 0 | 26.78  |
| candidatus caldiarchaeum subterraneum            | 0 | 14,5   |
| Thermoplasmatales archaeon SM1-50                | 0 | 25,7   |
| Thermoplasmatales archaeon DG-70                 | 0 | 18.4   |
| Thermoplasmatales archaeon SG8-52-4              | 0 | -0,09  |
| Thermoplasmatales archaeon SG8-52-3              | 0 | 39     |
| Thermofilum pendens Hrk5                         | 0 | -42.72 |
| Thermoplasmatales archaeon SCGC AB-539           | 0 | 16     |
| Thermoplasmatales archaeon E-plasma              | 0 | 86,2   |
| Thermoplasmatales archaeon I-plasma              | 0 | 52,38  |
| Thermoplasmatales archaeon A-plasma              | 0 | 22,07  |
| Pyrolobus fumarii                                | 0 | -20,7  |
| Candidatus Methanomethylophilus alvus Mx1201     | 0 | 23,3   |
| Thaumarchaeota archaeon SCGC AAA007-O23          | 0 | 29,46  |
| Thaumarchaeota archaeon JGI OTU-1                | 0 | 10,2   |
| Thaumarchaeota archaeon SCGCAB-179               | 0 | 7.79   |
| Nitrospina gracilis                              | 0 | 18,2   |
| Sinorhizobium                                    | 0 | -2.19  |
| Methylocaldum szegediense                        | 0 | -6,04  |
| Methanosarcina mazei Go1                         | 0 | 87     |
| Methanotroris igneus kol5                        | 0 | 112.25 |
| Nitrospina sp                                    | 0 | 10,87  |
| Methanoregula boonei 6A8                         | 0 | 1,65   |
| Candidatus Methanoperedens nitroreducens         | 0 | 20     |
| Methylococcus capsulatus str. Texas              | 0 | -15,7  |
| Methanothermococcus thermolithotrophicus DSM2095 | 0 | 101.85 |
| Methermicoccus shengliensis DSM 18856            | 0 | 0,35   |
| Methanocorpusculum labreanum Z                   | 0 | 43,36  |
| Methanomethylicus mesodigestum V2                | 0 | 7.79   |
| Methanomethylicus oleusabulum V2                 | 0 | 3.67   |
| Methanococcoides burtonii DSM 6242               | 0 | 99,44  |
| Methanocella arvoryzae MRE50                     | 0 | -2,2   |
| Methanocella paludicola SANAE                    | 0 | -2 ,2  |
| Methanocella conradii HZ254                      | 0 | 5,95   |
| Caldisphaera lagunensis DSM 15908                | 0 | 90.66  |
| Methanococcus vanniellii SB                      | 0 | 119.36 |



|                                                  |   |        |
|--------------------------------------------------|---|--------|
| Methanobrevibacter smithii ATCC35061             | 0 | 119.46 |
| Methanobacterium formicicum                      | 0 | 79.77  |
| Metallosphaera sedula DSM5348                    | 0 | 57.06  |
| Haloferax mediterranei ATCC 33500                | 0 | -58    |
| Lokiarchaeum SP.GC1475                           | 0 | 33.04  |
| Hyperthermus butylicus DSM5456                   | 0 | -22.82 |
| Hyphomicrobium                                   | 0 | -15.23 |
| Ferroplasma acidarmanus Fer1                     | 0 | 79,7   |
| Geoglobus ahangari                               | 0 | 21.81  |
| Altiarchaealesarchaeon IMC4                      | 0 | 37.8   |
| Candidatus Nitrosocosmius MY3                    | 0 | 165,7  |
| Hadesarchaeaearchaeon YNP45                      | 0 | 4.89   |
| Dunaliella salina                                | 0 | 113    |
| Cenarchaeum symbiosum A                          | 0 | -4,4   |
| Candidatus Odinarchaeota archaeon LCB_4          | 0 | 61.03  |
| Euryarchaeota archaeon SCGCAA252-I15             | 0 | 19.37  |
| Diplonema papillatum                             | 0 | -8,3   |
| Candidatus Nitrosotenuis cloacae                 | 0 | 69,2   |
| Desulfurococcus mobilis                          | 0 | 1,58   |
| Crenarchaeota JGI-OTU-1                          | 0 | 34.63  |
| Candidatus Bathyarchaeota archaeon B24           | 0 | 0,33   |
| Crenarchaeota groupe-15 archeon                  | 0 | 3,625  |
| Candidatus Lokiarchaeota archaeon CR_4           | 0 | 16.81  |
| Candidatus Heimdallarchaeota archaeon AB_125     | 0 | 19.11  |
| Candidatus Heimdallarchaeota archaeon LC_3       | 0 | 39.4   |
| Candidatus Syntrophoarchaeum butanivorans        | 0 | 43,05  |
| Candidatus Thalassoarchaea betae                 | 0 | 6,62   |
| Candidatus Heimdallarchaeota archaeon LC_2       | 0 | 40.15  |
| Candidatus alkanophagales                        | 0 | -1.02  |
| Candidatus Syntrophoarchaeum CALDARIS            | 0 | 24,22  |
| Candidatus Proteinoplasmatales archaeon SG8-5    | 0 | 0,09   |
| Candidate division MSBL1 archaeon SCGC-AAA259D14 | 0 | 8.3    |
| Aquifex pyrophilus                               | 0 | 0,032  |
| Thermococcus sibiricus MM739                     | 0 | -3.59  |

A

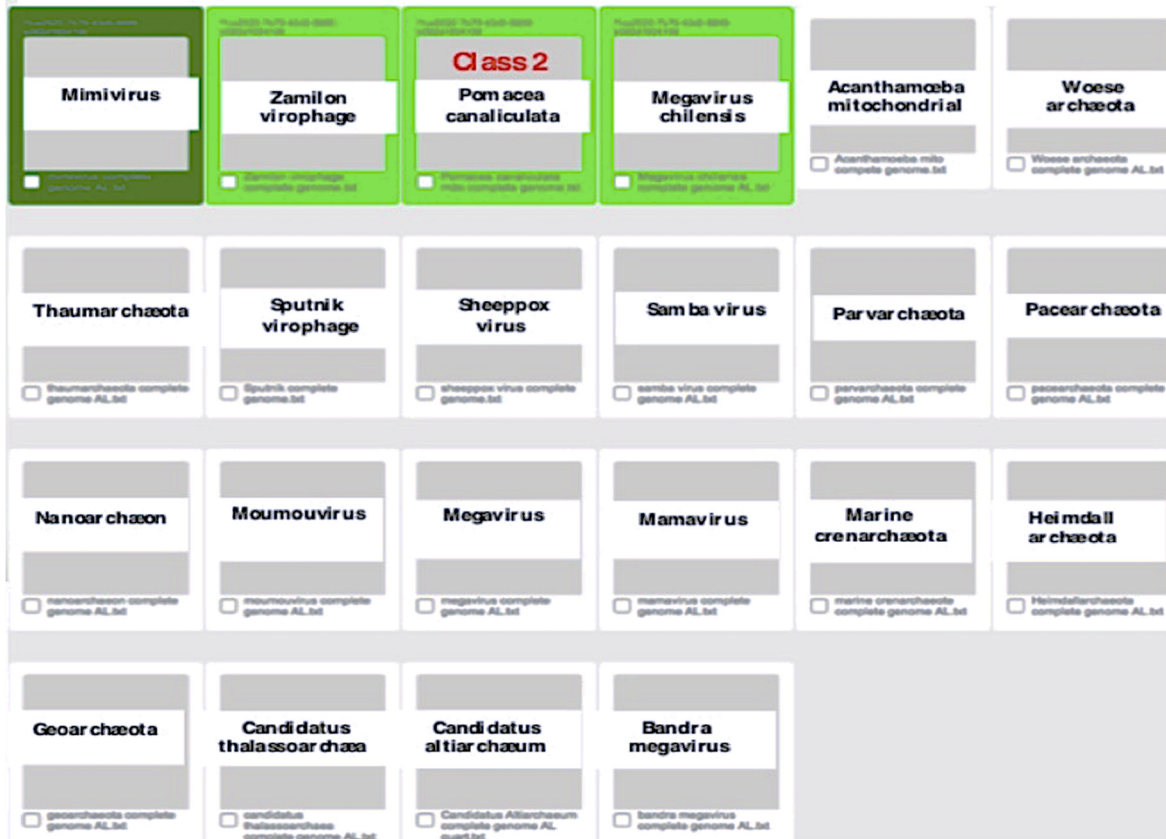

B

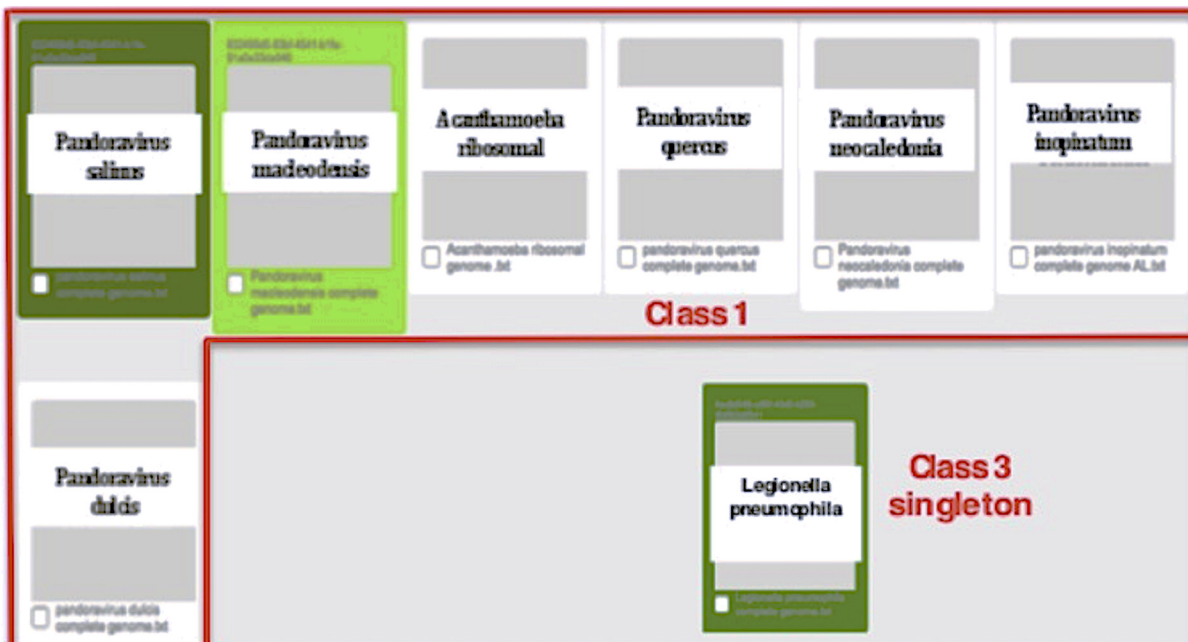

**Figure S2.** A) Class 2 from the classification by Maxwell of the Giant viruses, their virophages and infectious targets showing together Mimivirus, its virophage Zamilon and its target Acanthamoeba. B) Class 1 of the same classification bringing together genomes of the Pandora family plus its target Acanthamoeba castellanii. The class 3 contains a Bacterium Legionella pneumophila, for which Acanthamoebae serve as vehicles and hosts (see Gomes TS, Gjiknuri J, Magnet A, Vaccaro L, Ollero D, Izquierdo F, Fenoy S, Hurtado C, Del Águila C. The Influence of Acanthamoeba-Legionella Interaction in the Virulence of Two Different Legionella Species. Front Microbiol. 2018, 9:2962). A change of distance threshold causes the entry of the singleton into the class 1, proving their co-evolution.

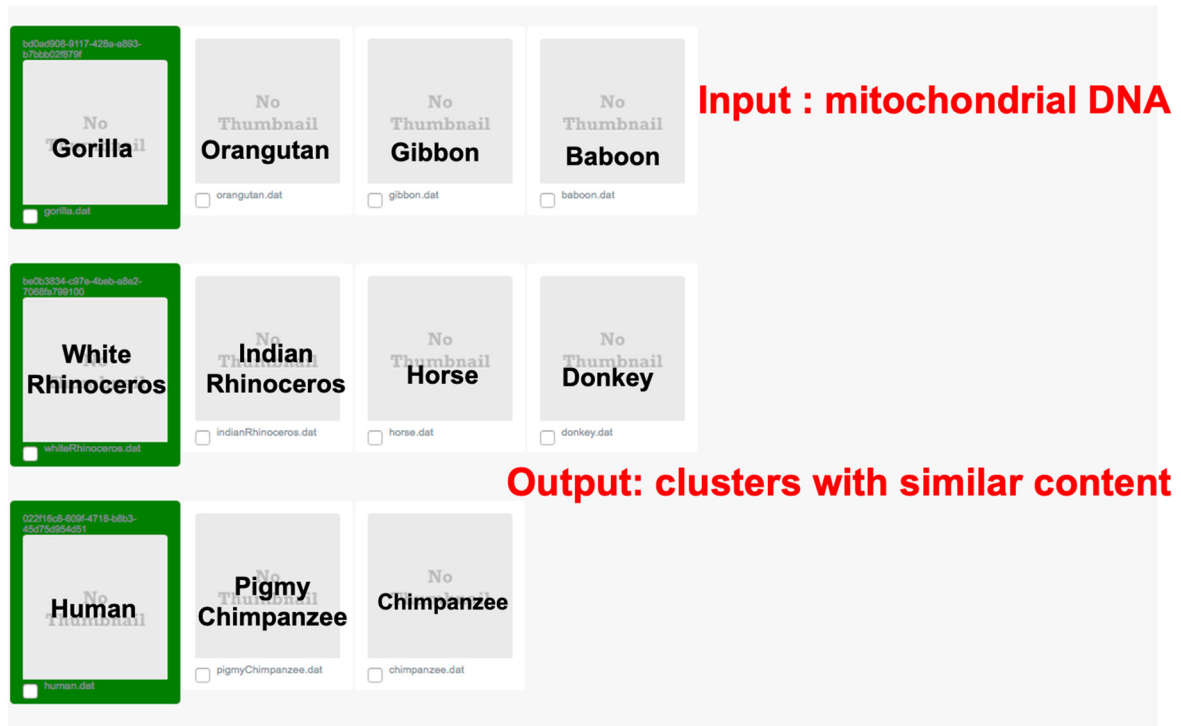

**Figure S3.** The classification by Maxwell of mammals from their mitochondrial DNA is coherent with the classical knowledge about their evolution.
